# Supplementary material for: Differences in polygenic score distributions in European ancestry populations: implications for breast cancer risk prediction
Source: PubMed Central journal article supplement — medRxiv. 2024 Feb 13:2024.02.12.24302043. Preprint. [Version 1] doi: 10.1101/2024.02.12.24302043 (PMC10896416; doi:10.1101/2024.02.12.24302043), 2024-02-13
Supplement: media-2.pdf [file media-2.pdf]

## Differences in polygenic score distributions in European ancestry populations: implications for breast cancer risk prediction

### Supplementary Tables

**Supplementary Table 1A:** Studies participating in BCAC by country used in the analysis.

| Study            | Controls | Cases | Total | Acronym                                                                                                            | Study design                                  |
|------------------|----------|-------|-------|--------------------------------------------------------------------------------------------------------------------|-----------------------------------------------|
| <b>Australia</b> |          |       |       |                                                                                                                    |                                               |
| ABCFS            | 738      | 1432  | 2170  | Australian Breast Cancer Family Study                                                                              | Case-control study                            |
| ABCTB            | 375      | 920   | 1295  | Australian Breast Cancer Tissue Bank                                                                               | Case-control study                            |
| BCEES            | 835      | 783   | 1618  | Breast Cancer Employment and Environment Study                                                                     | Case-control study                            |
| KCONFAB/AOCS     | 896      | 462   | 1358  | Kathleen Cuninghame Foundation Consortium for research into Familial Breast Cancer/Australian Ovarian Cancer Study | Case-control study                            |
| MCCS             | 1205     | 1065  | 2270  | Melbourne Collaborative Cohort Study                                                                               | Prospective cohort: nested case-control study |
| <b>Total</b>     | 4049     | 4662  | 8711  |                                                                                                                    |                                               |
| <b>Belarus</b>   |          |       |       |                                                                                                                    |                                               |
| HMBCS            | 342      | 744   | 1086  | Hannover-Minsk Breast Cancer Study                                                                                 | Case-control study                            |
| <b>Belgium</b>   |          |       |       |                                                                                                                    |                                               |
| LMBC             | 1823     | 3398  | 5221  | Leuven Multidisciplinary Breast Centre                                                                             | Case-control study                            |
| <b>Canada</b>    |          |       |       |                                                                                                                    |                                               |
| CBCS             | 817      | 568   | 1385  | Canadian Breast Cancer Study                                                                                       | Case-control study                            |
| MTLGEBCS         | 464      | 533   | 997   | Montreal Gene-Environment Breast Cancer Study                                                                      | Case-control study                            |
| OFBCR            | 996      | 2209  | 3205  | Ontario Familial Breast Cancer Registry                                                                            | Case-control study                            |
| <b>Total</b>     | 2277     | 3310  | 5587  |                                                                                                                    |                                               |
| <b>Denmark</b>   |          |       |       |                                                                                                                    |                                               |
| CGPS             | 5241     | 4275  | 9516  | Copenhagen General Population Study                                                                                | Case-control study                            |
| <b>Finland</b>   |          |       |       |                                                                                                                    |                                               |
| HEBCS            | 1236     | 1796  | 3032  | Helsinki Breast Cancer Study                                                                                       | Case-control study                            |
| KBCP             | 433      | 543   | 976   | Kuopio Breast Cancer Project                                                                                       | Case-control study                            |
| OBCS             | 414      | 499   | 913   | Oulu Breast Cancer Study                                                                                           | Case-control study                            |
| <b>Total</b>     | 2083     | 2838  | 4921  |                                                                                                                    |                                               |
| <b>France</b>    |          |       |       |                                                                                                                    |                                               |
| CECILE           | 1002     | 910   | 1912  | CECILE Breast Cancer Study                                                                                         | Case-control study                            |
| EPIC             | 370      | 378   | 748   | European Prospective Investigation Into Cancer and Nutrition                                                       | Prospective cohort: nested case-control study |
| <b>Total</b>     | 1372     | 1288  | 2660  |                                                                                                                    |                                               |
| <b>Germany</b>   |          |       |       |                                                                                                                    |                                               |
| BBCC             | 706      | 839   | 1545  | Bavarian Breast Cancer Cases and Controls                                                                          | Case-control study                            |

|                    |      |       |       |                                                                                           |                                               |
|--------------------|------|-------|-------|-------------------------------------------------------------------------------------------|-----------------------------------------------|
| BSUCH              | 1119 | 991   | 2110  | Breast Cancer Study of the University of Heidelberg                                       | Case-control study                            |
| EPIC               | 650  | 586   | 1236  | European Prospective Investigation Into Cancer and Nutrition                              | Prospective cohort: nested case-control study |
| ESTHER             | 505  | 475   | 980   | ESTHER Breast Cancer Study                                                                | Case-control study                            |
| GC-HBOC            | 1732 | 3378  | 5110  | German Consortium for Hereditary Breast & Ovarian Cancer                                  | Case-control study                            |
| GENICA             | 710  | 912   | 1622  | Gene Environment Interaction and Breast Cancer in Germany                                 | Case-control study                            |
| GEPARSIXTO         | 0    | 387   | 387   | Randomized phase II trial                                                                 | Case-only study                               |
| GESBC              | 181  | 312   | 493   | Genetic Epidemiology Study of Breast Cancer by Age 50                                     | Case-control study                            |
| HABCS              | 866  | 909   | 1775  | Hannover Breast Cancer Study                                                              | Case-control study                            |
| MARIE              | 2065 | 1642  | 3707  | Mammary Carcinoma Risk Factor Investigation                                               | Case-control study                            |
| PREFACE            | 0    | 2954  | 2954  | Evaluation of Predictive Factors regarding the Effectivity of Aromatase Inhibitor Therapy | Case-only study                               |
| SKKDKFZS           | 29   | 1220  | 1249  | Städtisches Klinikum Karlsruhe Deutsches Krebsforschungszentrum Study                     | Case-only study                               |
| SUCCESSB           | 0    | 440   | 440   | Simultaneous Study of Gemcitabine-Docetaxel Combination adjuvant treatment                | Case-only study                               |
| SUCCESSC           | 0    | 2836  | 2836  | Simultaneous Study of Docetaxel Based Anthracycline Free Adjuvant Treatment Evaluation    | Case-only study                               |
| <b>Total</b>       | 8563 | 17881 | 26444 |                                                                                           |                                               |
| <b>Greece</b>      |      |       |       |                                                                                           |                                               |
| CCGP               | 332  | 667   | 999   | Crete Cancer Genetics Program                                                             | Case-control study                            |
| EPIC               | 180  | 173   | 353   | European Prospective Investigation Into Cancer and Nutrition                              | Prospective cohort: nested case-control study |
| TNBCC              | 95   | 412   | 507   | Triple-Negative Breast Cancer Consortium                                                  | Case-control studies                          |
| <b>Total</b>       | 607  | 1252  | 1859  |                                                                                           |                                               |
| <b>Ireland</b>     |      |       |       |                                                                                           |                                               |
| BIGGS              | 719  | 793   | 1512  | Breast Cancer in Galway Genetic Study                                                     | Case-control study                            |
| <b>Israel</b>      |      |       |       |                                                                                           |                                               |
| BCINIS             | 724  | 1337  | 2061  | Breast Cancer in Northern Israel Study                                                    | Case-control study                            |
| <b>Italy</b>       |      |       |       |                                                                                           |                                               |
| EPIC               | 788  | 743   | 1531  | European Prospective Investigation Into Cancer and Nutrition                              | Prospective cohort: nested case-control study |
| MBCSG              | 766  | 738   | 1504  | Milan Breast Cancer Study Group                                                           | Case-control study                            |
| <b>Total</b>       | 1554 | 1481  | 3035  |                                                                                           |                                               |
| <b>Netherlands</b> |      |       |       |                                                                                           |                                               |
| ABCS               | 1817 | 1129  | 2946  | Amsterdam Breast Cancer Study                                                             | Case-control study                            |
| EPIC               | 676  | 630   | 1306  | European Prospective Investigation Into Cancer and Nutrition                              | Prospective cohort: nested case-control study |
| ORIGO              | 986  | 1239  | 2225  | Leiden University Medical Centre Breast Cancer Study                                      | Prospective cohort: nested case-control study |
| RBCS               | 928  | 1029  | 1957  | Rotterdam Breast Cancer Study                                                             | Case-control study                            |
| ABCS-F             | 0    | 989   | 989   | Amsterdam Breast Cancer Study – Familial                                                  | Case-only study                               |
| <b>Total</b>       | 4407 | 5016  | 9423  |                                                                                           |                                               |
| <b>Norway</b>      |      |       |       |                                                                                           |                                               |
| NBCS               | 217  | 2386  | 2603  | Norwegian Breast Cancer Study                                                             | Case-control study                            |
| <b>Poland</b>      |      |       |       |                                                                                           |                                               |

|                                    |       |       |       |                                                                                          |                                                  |
|------------------------------------|-------|-------|-------|------------------------------------------------------------------------------------------|--------------------------------------------------|
| PBCS                               | 2082  | 1767  | 3849  | NCI Polish Breast Cancer Study                                                           | Case-control study                               |
| SZBCS                              | 472   | 683   | 1155  | IHCC-Szczecin Breast Cancer Study                                                        | Case-control study                               |
| <b>Total</b>                       | 2554  | 2450  | 5004  |                                                                                          |                                                  |
| <b>Republic of North Macedonia</b> |       |       |       |                                                                                          |                                                  |
| MABCS                              | 92    | 78    | 170   | Macedonian Breast Cancer Study                                                           | Case-control study                               |
| <b>Russia</b>                      |       |       |       |                                                                                          |                                                  |
| HUBCS                              | 120   | 211   | 331   | Hannover-Ufa Breast Cancer Study                                                         | Case-control study                               |
| <b>Spain</b>                       |       |       |       |                                                                                          |                                                  |
| BREOGAN                            | 916   | 1536  | 2452  | Breast Oncology Galicia Network                                                          | Case-control study                               |
| CNIO-BCS                           | 871   | 866   | 1737  | Spanish National Cancer Centre Breast Cancer Study                                       | Case-control study                               |
| EPIC                               | 311   | 299   | 610   | European Prospective Investigation Into Cancer and Nutrition                             | Prospective cohort: nested case-control study    |
| HCSC                               | 0     | 423   | 423   | Hospital Clinico San Carlos                                                              | Case-control study                               |
| <b>Total</b>                       | 2098  | 3124  | 5222  |                                                                                          |                                                  |
| <b>Sweden</b>                      |       |       |       |                                                                                          |                                                  |
| KARBAC                             | 658   | 806   | 1464  | Karolinska Breast Cancer Study                                                           | Case-control study                               |
| KARMA                              | 6983  | 2839  | 9822  | Karolinska Mammography Project for Risk Prediction of Breast Cancer – Cohort Study       | Case-control study                               |
| MISS                               | 1545  | 633   | 2178  | Melanoma Inquiry of Southern Sweden                                                      | Prospective cohort: nested case-control study    |
| PKARMA                             | 5417  | 5041  | 10458 | Karolinska Mammography Project for Risk Prediction of Breast Cancer - Case-Control Study | Case-control study                               |
| SASBAC                             | 1373  | 1129  | 2502  | Singapore and Sweden Breast Cancer Study                                                 | Case-control study                               |
| SMC                                | 704   | 1509  | 2213  | Swedish Mammography Cohort                                                               | Prospective cohort: nested case-control study    |
| <b>Total</b>                       | 16680 | 11957 | 28637 |                                                                                          |                                                  |
| <b>UK</b>                          |       |       |       |                                                                                          |                                                  |
| BBCS                               | 1838  | 1525  | 3363  | British Breast Cancer Study                                                              | Case-control study                               |
| DIETCOMPLYF                        | 0     | 708   | 708   | DietCompLyf Breast Cancer Survival Study                                                 | Prospective cohort: nested case-control study    |
| EPIC                               | 669   | 626   | 1295  | European Prospective Investigation Into Cancer and Nutrition                             | Prospective cohort: nested case-control study    |
| FHRISK                             | 943   | 146   | 1089  | Family History Risk Study                                                                | Case-control study                               |
| GLACIER                            | 0     | 1918  | 1918  | Study to Investigate the Genetics of Lobular Carcinoma In situ in Europe                 |                                                  |
| ICICLE                             | 1     | 204   | 205   | Study to Investigate the Genetics of In Situ Carcinoma of the Ductal Subtype             |                                                  |
| POSH                               | 0     | 1088  | 1088  | Prospective Study of Outcomes in Sporadic Versus Hereditary Breast Cancer                | Case-only study                                  |
| PROCAS                             | 1648  | 380   | 2028  | Predicting the Risk Of Cancer At Screening Study                                         | Prospective cohort: nested case-control study    |
| SBCS                               | 848   | 878   | 1726  | Sheffield Breast Cancer Study                                                            | Case-control study                               |
| SEARCH                             | 8901  | 12805 | 21706 | Study of Epidemiology and Risk factors in Cancer Heredity                                | Case-control study                               |
| UKBGS                              | 1032  | 1053  | 2085  | UK Breakthrough Generations Study                                                        | Prospective cohort: nested case-control study    |
| UKOPS                              | 974   | 0     | 974   | UK Ovarian Cancer Population Study                                                       | Case-control study                               |
| <b>Total</b>                       | 16854 | 21331 | 38185 |                                                                                          |                                                  |
| <b>USA</b>                         |       |       |       |                                                                                          |                                                  |
| 2SISTER                            | 0     | 919   | 919   | The Two Sister Study                                                                     | Case-only study                                  |
| AHS                                | 1137  | 513   | 1650  | Agricultural Health Study                                                                | Prospective cohorts: nested case-control studies |
| BCFR-NY                            | 27    | 384   | 411   | New York site of the Breast Cancer Family Registry                                       | Case-control study                               |

|              |              |               |               |                                                                          |                                               |
|--------------|--------------|---------------|---------------|--------------------------------------------------------------------------|-----------------------------------------------|
| BCFR-PA      | 0            | 67            | 67            | Philadelphia site of the Breast Cancer Family Registry                   | Case-control study                            |
| BCFR-UTAH    | 0            | 100           | 100           | Utah site of the Breast Cancer Family Registry                           | Case-control study                            |
| CPSII        | 3315         | 2525          | 5840          | Cancer Prevention Study-II Nutrition Cohort                              | Prospective cohort: nested case-control study |
| CTS          | 647          | 1176          | 1823          | California Teachers Study                                                | Prospective cohort: nested case-control study |
| MCBCS        | 2050         | 2071          | 4121          | Mayo Clinic Breast Cancer Study                                          | Case-control study                            |
| MEC          | 852          | 773           | 1625          | Multiethnic Cohort                                                       | Prospective cohort: nested case-control study |
| MMHS         | 1635         | 275           | 1910          | Mayo Mammography Health Study                                            | Prospective cohort: nested case-control study |
| MSKCC        | 0            | 136           | 136           | Memorial Sloan-Kettering Cancer Center Study                             | Case-control study                            |
| NBHS         | 731          | 572           | 1303          | Nashville Breast Health Study                                            | Case-control study                            |
| NC-BCFR      | 151          | 759           | 910           | Northern California Breast Cancer Family Registry                        | Case-control study                            |
| NCBCS        | 1006         | 2074          | 3080          | North Carolina Breast Cancer study                                       | Case-control study                            |
| NHS          | 1804         | 1103          | 2907          | Nurses Health Study                                                      | Prospective cohort: nested case-control study |
| NHS2         | 1905         | 1112          | 3017          | Nurses Health Study 2                                                    | Prospective cohort: nested case-control study |
| PLCO         | 2595         | 1822          | 4417          | The Prostate, Lung, Colorectal and Ovarian (PLCO) Cancer Screening Trial | Prospective cohort: nested case-control study |
| SISTER       | 1556         | 1504          | 3060          | The Sister Study                                                         | Prospective cohort: nested case-control study |
| TNBCC        | 328          | 176           | 504           | Triple-Negative Breast Cancer Consortium                                 | Case-control studies                          |
| UBCS         | 0            | 606           | 606           | Utah Breast Cancer Study                                                 |                                               |
| UCIBCS       | 258          | 427           | 685           | UCI Breast Cancer Study                                                  | Case-control study                            |
| USRT         | 1699         | 1354          | 3053          | US Radiologic Technologists Study                                        | Case-control study                            |
| <b>Total</b> | 21696        | 20448         | 42144         |                                                                          |                                               |
| <b>Total</b> | <b>94072</b> | <b>110260</b> | <b>204332</b> |                                                                          |                                               |

**Supplementary Table 1B:** Total number of white female individuals participating in the UK Biobank stratified by country of birth, used in the analysis.

| <b>Country</b>       | <b>Controls used to calculate PRS<sub>306</sub></b> | <b>Controls used to calculate standard PRS</b> |
|----------------------|-----------------------------------------------------|------------------------------------------------|
| Australia            | 507                                                 | 507                                            |
| Austria              | 118                                                 | 118                                            |
| Canada               | 434                                                 | 434                                            |
| Cyprus               | 131                                                 | 131                                            |
| Denmark              | 152                                                 | 152                                            |
| Finland              | 130                                                 | 130                                            |
| France               | 539                                                 | 538                                            |
| Germany              | 1283                                                | 1281                                           |
| Ireland              | 2462                                                | 2459                                           |
| Italy                | 347                                                 | 347                                            |
| Malta                | 165                                                 | 165                                            |
| Netherlands          | 308                                                 | 308                                            |
| New Zealand          | 369                                                 | 368                                            |
| Poland               | 406                                                 | 406                                            |
| Portugal             | 180                                                 | 180                                            |
| Russia               | 118                                                 | 118                                            |
| Spain                | 201                                                 | 201                                            |
| Sweden               | 141                                                 | 141                                            |
| Switzerland          | 121                                                 | 121                                            |
| UK, England          | 184385                                              | 184106                                         |
| UK, Northern Ireland | 1454                                                | 1453                                           |
| UK, Scotland         | 19658                                               | 19628                                          |
| UK, Wales            | 10679                                               | 10668                                          |
| USA                  | 817                                                 | 816                                            |
| <b>Total</b>         | <b>225105</b>                                       | <b>224776</b>                                  |

**Supplementary Table 2:** The 313 variants included in the PRS<sub>313</sub> as calculated by Mavaddat et al., 2019 AJHG (1). Seven variants (indicated with an asterisk) of PRS<sub>313</sub> were not available in the UK Biobank.

| SNP name                    | Chromosome | Position b37 <sup>1</sup> | Reference/Effect Allele | Effect size for Overall PRS <sup>2</sup> | Effect size for ER-positive PRS <sup>3</sup> | Effect size for ER-negative PRS <sup>4</sup> |
|-----------------------------|------------|---------------------------|-------------------------|------------------------------------------|----------------------------------------------|----------------------------------------------|
| 1_7917076_G_A               | 1          | 7917076                   | G/A                     | -0.0409                                  | -0.0393                                      | -0.0566                                      |
| 1_10566215_A_G              | 1          | 10566215                  | A/G                     | -0.0586                                  | -0.0407                                      | -0.1109                                      |
| 1_18807339_T_C              | 1          | 18807339                  | T/C                     | -0.0564                                  | -0.0649                                      | -0.0248                                      |
| 1_41380440_C_T              | 1          | 41380440                  | C/T                     | 0.0426                                   | 0.0423                                       | 0.0395                                       |
| 1_41389220_T_C              | 1          | 41389220                  | T/C                     | 0.1550                                   | 0.1377                                       | 0.1483                                       |
| 1_46670206_TC_T             | 1          | 46670206                  | TC/T                    | 0.0447                                   | 0.0595                                       | 0.0216                                       |
| 1_51467096_CT_C             | 1          | 51467096                  | CT/C                    | 0.0374                                   | 0.0426                                       | 0.0038                                       |
| 1_88156923_G_A              | 1          | 88156923                  | G/A                     | 0.0494                                   | 0.058                                        | 0.0183                                       |
| 1_88428199_C_A              | 1          | 88428199                  | C/A                     | -0.0387                                  | -0.0385                                      | -0.047                                       |
| 1_100880328_A_T             | 1          | 100880328                 | A/T                     | 0.0373                                   | 0.0355                                       | 0.016                                        |
| 1_110198129_CAAA_C          | 1          | 110198129                 | CAAA/C                  | 0.0458                                   | 0.0545                                       | 0.0266                                       |
| 1_114445880_G_A             | 1          | 114445880                 | G/A                     | 0.0621                                   | 0.0642                                       | 0.0579                                       |
| 1_118141492_A_C             | 1          | 118141492                 | A/C                     | 0.0452                                   | 0.0417                                       | 0.0551                                       |
| 1_120257110_T_C             | 1          | 120257110                 | T/C                     | 0.0385                                   | 0.043                                        | 0.0226                                       |
| 1_121280613_A_G             | 1          | 121280613                 | A/G                     | 0.0881                                   | 0.1052                                       | 0.0209                                       |
| 1_121287994_A_G             | 1          | 121287994                 | A/G                     | -0.0673                                  | -0.0814                                      | -0.0114                                      |
| 1_145604302_C_CT            | 1          | 145604302                 | C/CT                    | -0.0399                                  | -0.0469                                      | -0.0126                                      |
| 1_149906413_T_C             | 1          | 149906413                 | T/C                     | 0.0548                                   | 0.0625                                       | 0.0388                                       |
| 1_155556971_G_A             | 1          | 155556971                 | G/A                     | 0.0499                                   | 0.0606                                       | 0.0263                                       |
| 1_168171052_CA_C            | 1          | 168171052                 | CA/C                    | -0.0680                                  | -0.0774                                      | -0.0718                                      |
| 1_172328767_T_TA            | 1          | 172328767                 | T/TA                    | -0.0435                                  | -0.0417                                      | -0.0655                                      |
| 1_201437832_C_T             | 1          | 201437832                 | C/T                     | 0.0917                                   | 0.0815                                       | 0.0714                                       |
| 1_202184600_C_T             | 1          | 202184600                 | C/T                     | -0.0065                                  | 0.0133                                       | -0.0822                                      |
| 1_203770448_T_A             | 1          | 203770448                 | T/A                     | 0.0498                                   | 0.0472                                       | 0.0332                                       |
| 1_204502514_T_TTCTGAAACAGGG | 1          | 204502514                 | T/TTCTGAAACAGGG         | -0.0321                                  | -0.0024                                      | -0.1345                                      |
| 1_208076291_G_A             | 1          | 208076291                 | G/A                     | -0.0366                                  | -0.0313                                      | -0.0278                                      |
| 1_217053815_T_G             | 1          | 217053815                 | T/G                     | 0.0417                                   | 0.0409                                       | 0.0472                                       |
| 1_217220574_G_A             | 1          | 217220574                 | G/A                     | -0.0440                                  | -0.0459                                      | 0.0029                                       |
| 1_220671050_C_T             | 1          | 220671050                 | C/T                     | 0.0418                                   | 0.0482                                       | 0.0153                                       |
| 1_242034263_A_G             | 1          | 242034263                 | A/G                     | 0.1428                                   | 0.1519                                       | 0.1413                                       |
| 2_10138983_T_C              | 2          | 10138983                  | T/C                     | 0.0603                                   | 0.0596                                       | 0.0458                                       |
| 2_19315675_T_A              | 2          | 19315675                  | T/A                     | -0.0331                                  | -0.0229                                      | -0.057                                       |
| 2_25129473_A_G              | 2          | 25129473                  | A/G                     | -0.0427                                  | -0.0365                                      | -0.067                                       |
| 2_29179452_G_C              | 2          | 29179452                  | G/C                     | -0.0066                                  | 0.0207                                       | -0.1006                                      |
| 2_29615233_T_C              | 2          | 29615233                  | T/C                     | -0.0427                                  | -0.0489                                      | -0.0371                                      |
| 2_39699510_C_CT             | 2          | 39699510                  | C/CT                    | -0.0402                                  | -0.0336                                      | -0.0538                                      |
| 2_70172587_G_A              | 2          | 70172587                  | G/A                     | -0.0412                                  | -0.0334                                      | -0.0361                                      |
| 2_88358825_G_C              | 2          | 88358825                  | G/C                     | 0.0473                                   | 0.0443                                       | 0.0505                                       |
| 2_121058254_A_G             | 2          | 121058254                 | A/G                     | -0.0334                                  | -0.0232                                      | -0.0682                                      |
| 2_121089731_T_C             | 2          | 121089731                 | T/C                     | -0.0427                                  | -0.029                                       | -0.1027                                      |
| 2_121159205_G_A             | 2          | 121159205                 | G/A                     | -0.0440                                  | -0.0507                                      | -0.0162                                      |
| 2_121246568_T_C             | 2          | 121246568                 | T/C                     | 0.0992                                   | 0.092                                        | 0.1112                                       |
| 2_172974566_C_G             | 2          | 172974566                 | C/G                     | -0.0473                                  | -0.0611                                      | -0.0061                                      |
| 2_174212910_A_G             | 2          | 174212910                 | A/G                     | 0.0593                                   | 0.0621                                       | 0.0175                                       |
| 2_192381934_C_T             | 2          | 192381934                 | C/T                     | 0.0316                                   | 0.018                                        | 0.1012                                       |
| 2_202204741_T_C             | 2          | 202204741                 | T/C                     | -0.0492                                  | -0.0505                                      | -0.0526                                      |
| 2_217920769_G_T             | 2          | 217920769                 | G/T                     | -0.1318                                  | -0.1532                                      | -0.0589                                      |
| 2_217955896_GA_G            | 2          | 217955896                 | GA/G                    | -0.2016                                  | -0.2362                                      | -0.0558                                      |
| 2_218292158_C_G             | 2          | 218292158                 | C/G                     | -0.0757                                  | -0.0813                                      | -0.0599                                      |
| 2_218714845_G_A             | 2          | 218714845                 | G/A                     | -0.0431                                  | -0.0463                                      | -0.0184                                      |
| 2_241388857_C_A             | 2          | 241388857                 | C/A                     | -0.1232                                  | -0.1335                                      | -0.1727                                      |
| 3_4742251_A_G               | 3          | 4742251                   | A/G                     | 0.0616                                   | 0.0609                                       | 0.0422                                       |
| 3_27353716_C_A              | 3          | 27353716                  | C/A                     | 0.0748                                   | 0.0822                                       | 0.031                                        |
| 3_27388664_C_G              | 3          | 27388664                  | C/G                     | 0.0502                                   | 0.0539                                       | 0.0297                                       |
| 3_29294845_C_T              | 3          | 29294845                  | C/T                     | -0.1281                                  | -0.1221                                      | -0.2988                                      |
| 3_30684907_C_T              | 3          | 30684907                  | C/T                     | 0.0592                                   | 0.0657                                       | 0.017                                        |
| 3_46888198_T_C              | 3          | 46888198                  | T/C                     | -0.0806                                  | -0.0842                                      | -0.0716                                      |
| 3_49709912_C_CT             | 3          | 49709912                  | C/CT                    | -0.0367                                  | -0.0355                                      | -0.0721                                      |
| 3_55970777_A_AT             | 3          | 55970777                  | A/AT                    | -0.1195                                  | -0.124                                       | -0.0586                                      |
| 3_59373745_C_T              | 3          | 59373745                  | C/T                     | -0.0394                                  | -0.0439                                      | -0.0398                                      |
| 3_63887449_T_TTG*           | 3          | 63887449                  | T/TTG                   | 0.0648                                   | 0.0627                                       | 0.043                                        |
| 3_71620370_T_G              | 3          | 71620370                  | T/G                     | -0.0374                                  | -0.0345                                      | -0.0379                                      |
| 3_87037543_A_G              | 3          | 87037543                  | A/G                     | -0.0723                                  | -0.0726                                      | -0.0531                                      |
| 3_99403877_G_A              | 3          | 99403877                  | G/A                     | -0.0376                                  | -0.0378                                      | -0.0279                                      |
| 3_141112859_CTT_C           | 3          | 141112859                 | CTT/C                   | 0.0551                                   | 0.0607                                       | 0.0282                                       |
| 3_172285237_G_A             | 3          | 172285237                 | G/A                     | 0.0422                                   | 0.0501                                       | -0.0133                                      |
| 3_189774456_C_T             | 3          | 189774456                 | C/T                     | -0.0478                                  | -0.0469                                      | -0.0449                                      |

|                       |   |           |           |         |         |         |
|-----------------------|---|-----------|-----------|---------|---------|---------|
| 4_38784633_G_T        | 4 | 38784633  | G/T       | 0.0489  | 0.0495  | 0.0497  |
| 4_84370124_TAA_TA*    | 4 | 84370124  | TAA/TA    | -0.0464 | -0.0438 | -0.0489 |
| 4_89240476_G_A        | 4 | 89240476  | G/A       | 0.0352  | 0.0392  | 0.0261  |
| 4_92594859_TTCITTC_T  | 4 | 92594859  | TTCITTC/T | -0.0407 | -0.0377 | -0.0359 |
| 4_106069013_G_T       | 4 | 106069013 | G/T       | 0.0471  | 0.0594  | 0.0097  |
| 4_126752992_A_AAT*    | 4 | 126752992 | A/AAT     | -0.0377 | -0.0361 | -0.0638 |
| 4_143467195_C_T       | 4 | 143467195 | C/T       | -0.0569 | -0.0613 | -0.0594 |
| 4_151218296_CATATTT_C | 4 | 151218296 | CATATTT/C | 0.0388  | 0.0307  | 0.0557  |
| 4_175842495_G_A       | 4 | 175842495 | G/A       | -0.0898 | -0.1162 | 0.0199  |
| 4_175847436_C_A       | 4 | 175847436 | C/A       | 0.0348  | 0.0537  | -0.0099 |
| 4_187503758_A_T*      | 4 | 187503758 | A/T       | 0.0357  | 0.0352  | 0.0194  |
| 5_345109_T_C          | 5 | 345109    | T/C       | 0.0840  | 0.0856  | 0.0681  |
| 5_1279790_C_T         | 5 | 1279790   | C/T       | 0.0617  | 0.0325  | 0.1502  |
| 5_1296255_A_AG        | 5 | 1296255   | A/AG      | -0.0549 | -0.0417 | -0.1056 |
| 5_1353077_T_C         | 5 | 1353077   | T/C       | 0.1552  | 0.1572  | 0.1214  |
| 5_2777029_G_A         | 5 | 2777029   | G/A       | 0.0391  | 0.041   | 0.0231  |
| 5_16231194_G_C        | 5 | 16231194  | G/C       | -0.0426 | -0.0458 | -0.0404 |
| 5_32579616_TCA_T      | 5 | 32579616  | TCA/T     | 0.0363  | 0.0394  | 0.0072  |
| 5_44508264_G_GT       | 5 | 44508264  | G/GT      | -0.1177 | -0.126  | -0.1053 |
| 5_44619502_A_G        | 5 | 44619502  | A/G       | -0.1101 | -0.1186 | -0.0959 |
| 5_44649944_C_T        | 5 | 44649944  | C/T       | 0.0492  | 0.0713  | -0.0261 |
| 5_44706498_A_G        | 5 | 44706498  | A/G       | 0.0497  | 0.0648  | -0.0256 |
| 5_44853593_G_C        | 5 | 44853593  | G/C       | -0.0336 | -0.0222 | -0.0778 |
| 5_52679539_C_CA*      | 5 | 52679539  | C/CA      | 0.0571  | 0.0663  | 0.042   |
| 5_55662540_C_CT       | 5 | 55662540  | C/CT      | -0.0458 | -0.045  | -0.0299 |
| 5_55965167_C_T        | 5 | 55965167  | C/T       | 0.0394  | 0.0379  | 0.0405  |
| 5_56023083_T_G        | 5 | 56023083  | T/G       | 0.1366  | 0.1612  | 0.0686  |
| 5_56042972_C_T        | 5 | 56042972  | C/T       | 0.0865  | 0.1082  | 0.0058  |
| 5_56045081_T_C        | 5 | 56045081  | T/C       | -0.0564 | -0.0643 | -0.0168 |
| 5_58241712_C_T        | 5 | 58241712  | C/T       | -0.0434 | -0.0369 | -0.0408 |
| 5_71965007_G_A        | 5 | 71965007  | G/A       | -0.0410 | -0.0445 | -0.0238 |
| 5_73234583_T_C        | 5 | 73234583  | T/C       | -0.0363 | -0.0494 | -0.0101 |
| 5_77155397_GT_G       | 5 | 77155397  | GT/G      | -0.0408 | -0.0418 | -0.0489 |
| 5_79180995_G_GA       | 5 | 79180995  | G/GA      | 0.0328  | 0.0248  | 0.0804  |
| 5_81512947_TA_T       | 5 | 81512947  | TA/T      | -0.0598 | -0.0731 | -0.0342 |
| 5_90789470_G_A        | 5 | 90789470  | G/A       | -0.0564 | -0.0714 | -0.0031 |
| 5_104300273_G_T       | 5 | 104300273 | G/T       | -0.0487 | -0.0524 | -0.0271 |
| 5_122478676_C_A       | 5 | 122478676 | C/A       | -0.0386 | -0.0376 | -0.04   |
| 5_122705244_C_T       | 5 | 122705244 | C/T       | 0.0944  | 0.0963  | 0.0607  |
| 5_131640536_A_G       | 5 | 131640536 | A/G       | 0.0392  | 0.0467  | 0.0099  |
| 5_132407058_C_T       | 5 | 132407058 | C/T       | -0.0388 | -0.0561 | -0.0214 |
| 5_158244083_C_T       | 5 | 158244083 | C/T       | -0.0677 | -0.0635 | -0.0646 |
| 5_169591460_T_C       | 5 | 169591460 | T/C       | 0.0412  | 0.0501  | 0.0182  |
| 5_173358154_G_A       | 5 | 173358154 | G/A       | 0.0365  | 0.0395  | 0.0346  |
| 5_176134882_T_C       | 5 | 176134882 | T/C       | 0.0363  | 0.0368  | 0.0262  |
| 6_13713366_G_C        | 6 | 13713366  | G/C       | -0.0553 | -0.0623 | -0.0152 |
| 6_16399557_C_T        | 6 | 16399557  | C/T       | -0.0373 | -0.0435 | -0.0324 |
| 6_18783140_G_A        | 6 | 18783140  | G/A       | 0.0326  | 0.0478  | 0.0033  |
| 6_20537845_CA_C       | 6 | 20537845  | CA/C      | -0.0391 | -0.0416 | -0.0315 |
| 6_21923810_T_C        | 6 | 21923810  | T/C       | -0.0321 | -0.0438 | -0.0032 |
| 6_27425644_G_C        | 6 | 27425644  | G/C       | -0.0737 | -0.0838 | -0.0506 |
| 6_43227141_G_A        | 6 | 43227141  | G/A       | -0.0640 | -0.0614 | -0.0673 |
| 6_82263549_AAT_A      | 6 | 82263549  | AAT/A     | 0.0477  | 0.0406  | 0.0686  |
| 6_85912194_CAA_C      | 6 | 85912194  | CAA/C     | 0.0762  | 0.0569  | 0.0682  |
| 6_87803819_T_C        | 6 | 87803819  | T/C       | 0.0383  | 0.0318  | 0.0678  |
| 6_130341728_C_CT      | 6 | 130341728 | C/CT      | 0.0472  | 0.0433  | 0.0804  |
| 6_149595505_T_C       | 6 | 149595505 | T/C       | -0.0476 | -0.0601 | -0.0235 |
| 6_151949806_A_C       | 6 | 151949806 | A/C       | 0.0703  | 0.0541  | 0.1103  |
| 6_151955914_A_G       | 6 | 151955914 | A/G       | 0.1449  | 0.115   | 0.224   |
| 6_152022664_CAAAAA_C  | 6 | 152022664 | CAAAAAA/C | 0.0137  | 0.0185  | -0.017  |
| 6_152023191_G_A       | 6 | 152023191 | G/A       | 0.0626  | 0.0509  | 0.1008  |
| 6_152055978_A_T       | 6 | 152055978 | A/T       | 0.0740  | 0.0634  | 0.108   |
| 6_152432902_C_T       | 6 | 152432902 | C/T       | 0.0649  | 0.0527  | 0.0965  |
| 6_169006947_C_G       | 6 | 169006947 | C/G       | -0.0308 | -0.0252 | -0.0628 |
| 6_170332621_T_C       | 6 | 170332621 | T/C       | 0.0373  | 0.0403  | 0.0334  |
| 7_21940960_A_G        | 7 | 21940960  | A/G       | -0.0467 | -0.0413 | -0.0574 |
| 7_25569548_C_T        | 7 | 25569548  | C/T       | -0.0486 | -0.0485 | -0.0682 |
| 7_28869017_G_A        | 7 | 28869017  | G/A       | -0.0572 | -0.0504 | -0.0487 |
| 7_55192256_A_C        | 7 | 55192256  | A/C       | -0.0349 | -0.0269 | -0.0536 |
| 7_91459189_A_ATT*     | 7 | 91459189  | A/ATT     | 0.0452  | 0.0439  | 0.0486  |
| 7_94113799_T_C        | 7 | 94113799  | T/C       | 0.0449  | 0.0489  | 0.0116  |

|                    |    |           |         |         |         |         |
|--------------------|----|-----------|---------|---------|---------|---------|
| 7_98005235_G_A     | 7  | 98005235  | G/A     | -0.0467 | -0.0466 | -0.0267 |
| 7_99948655_T_G     | 7  | 99948655  | T/G     | 0.0420  | 0.0385  | 0.0497  |
| 7_101552440_G_A    | 7  | 101552440 | G/A     | -0.0568 | -0.0742 | -0.0241 |
| 7_102481842_T_C    | 7  | 102481842 | T/C     | 0.0418  | 0.0406  | 0.0411  |
| 7_130656911_C_T    | 7  | 130656911 | C/T     | -0.0476 | -0.0522 | -0.025  |
| 7_130674481_G_A    | 7  | 130674481 | G/A     | 0.0416  | 0.0407  | 0.028   |
| 7_139943702_CT_C   | 7  | 139943702 | CT/C    | 0.0582  | 0.0666  | 0.0057  |
| 7_144048902_G_T    | 7  | 144048902 | G/T     | -0.0563 | -0.0592 | -0.0148 |
| 8_170692_T_C       | 8  | 170692    | T/C     | 0.0477  | 0.0348  | 0.104   |
| 8_17787610_CT_C    | 8  | 17787610  | CT/C    | -0.0377 | -0.0367 | -0.0295 |
| 8_23447496_A_G     | 8  | 23447496  | A/G     | -0.0389 | -0.0361 | -0.0426 |
| 8_23663653_C_A     | 8  | 23663653  | C/A     | 0.0335  | 0.0451  | 0.0059  |
| 8_29509616_A_C     | 8  | 29509616  | A/C     | -0.0601 | -0.0655 | -0.0512 |
| 8_36858483_A_G     | 8  | 36858483  | A/G     | -0.0760 | -0.0713 | -0.1013 |
| 8_76230943_A_G     | 8  | 76230943  | A/G     | 0.0755  | 0.0817  | 0.0617  |
| 8_76333056_C_T     | 8  | 76333056  | C/T     | 0.1129  | 0.1216  | 0.0879  |
| 8_76378165_G_T     | 8  | 76378165  | G/T     | -0.0391 | -0.0418 | -0.026  |
| 8_102483100_T_C    | 8  | 102483100 | T/C     | 0.0593  | 0.0736  | 0.0137  |
| 8_106358620_A_T    | 8  | 106358620 | A/T     | -0.0745 | -0.0895 | -0.01   |
| 8_117209548_A_G    | 8  | 117209548 | A/G     | -0.0417 | -0.0456 | -0.0409 |
| 8_120862186_A_G    | 8  | 120862186 | A/G     | 0.0527  | 0.0598  | 0.0472  |
| 8_124563705_T_C    | 8  | 124563705 | T/C     | 0.0477  | 0.0465  | 0.0503  |
| 8_124571581_G_A    | 8  | 124571581 | G/A     | 0.0340  | 0.0355  | 0.0388  |
| 8_124739913_T_G    | 8  | 124739913 | T/G     | 0.0466  | 0.0395  | 0.0706  |
| 8_128213561_C_CA   | 8  | 128213561 | C/CA    | -0.0430 | -0.0468 | -0.04   |
| 8_128370949_C_G    | 8  | 128370949 | C/G     | 0.0642  | 0.082   | 0.0076  |
| 8_128372172_A_G    | 8  | 128372172 | A/G     | 0.0597  | 0.0508  | 0.057   |
| 8_129199566_G_A    | 8  | 129199566 | G/A     | 0.0615  | 0.0643  | 0.0505  |
| 8_143669254_A_G    | 8  | 143669254 | A/G     | -0.0346 | -0.0518 | -0.022  |
| 9_6880263_A_G      | 9  | 6880263   | A/G     | 0.0348  | 0.0499  | -0.0078 |
| 9_21964882_CAAAA_C | 9  | 21964882  | CAAAA/C | 0.0550  | 0.0467  | 0.0576  |
| 9_22041998_C_G     | 9  | 22041998  | C/G     | 0.0289  | 0.0168  | 0.0906  |
| 9_36928288_T_C     | 9  | 36928288  | T/C     | 0.0249  | 0.0259  | 0.0631  |
| 9_87782211_T_C     | 9  | 87782211  | T/C     | 0.0361  | 0.0432  | 0.0218  |
| 9_98362587_T_C     | 9  | 98362587  | T/C     | 0.0576  | 0.0625  | 0.0828  |
| 9_110303808_TAA_T  | 9  | 110303808 | TAA/T   | 0.0797  | 0.1007  | 0.013   |
| 9_110837073_A_G    | 9  | 110837073 | A/G     | 0.1158  | 0.1315  | 0.0289  |
| 9_110837176_C_T    | 9  | 110837176 | C/T     | 0.0653  | 0.0809  | -0.0037 |
| 9_110849525_G_T    | 9  | 110849525 | G/T     | 0.0153  | 0.0111  | 0.0336  |
| 9_110885479_C_T    | 9  | 110885479 | C/T     | 0.0877  | 0.111   | 0.0019  |
| 9_119313486_A_G    | 9  | 119313486 | A/G     | -0.0462 | -0.0477 | -0.0403 |
| 9_129424719_A_G    | 9  | 129424719 | A/G     | -0.0382 | -0.0437 | -0.0287 |
| 9_136146597_C_T    | 9  | 136146597 | C/T     | 0.0400  | 0.04    | 0.0253  |
| 10_5794652_A_G     | 10 | 5794652   | A/G     | 0.0470  | 0.0504  | 0.0385  |
| 10_13892298_G_A    | 10 | 13892298  | G/A     | 0.0371  | 0.0362  | 0.0382  |
| 10_22032942_A_G    | 10 | 22032942  | A/G     | -0.0580 | -0.0719 | 0.0344  |
| 10_22477776_ACC_A  | 10 | 22477776  | ACC/A   | 0.1687  | 0.1668  | 0.1849  |
| 10_22861490_A_C    | 10 | 22861490  | A/C     | 0.0875  | 0.096   | 0.0201  |
| 10_38523626_C_A    | 10 | 38523626  | C/A     | 0.0404  | 0.0381  | 0.0418  |
| 10_64299890_A_G    | 10 | 64299890  | A/G     | -0.1345 | -0.1428 | -0.103  |
| 10_64819996_G_T    | 10 | 64819996  | G/T     | 0.0472  | 0.0442  | 0.0403  |
| 10_71335574_C_T    | 10 | 71335574  | C/T     | -0.0404 | -0.0411 | -0.054  |
| 10_80851257_G_T    | 10 | 80851257  | G/T     | -0.0805 | -0.0898 | -0.0443 |
| 10_80886726_A_G    | 10 | 80886726  | A/G     | 0.0762  | 0.078   | 0.0444  |
| 10_95292187_CAA_C  | 10 | 95292187  | CAA/C   | -0.0512 | -0.049  | -0.0419 |
| 10_114777670_C_T   | 10 | 114777670 | C/T     | 0.0472  | 0.0422  | 0.0559  |
| 10_115128491_T_C   | 10 | 115128491 | T/C     | -0.0592 | -0.0602 | -0.0592 |
| 10_123095209_G_A   | 10 | 123095209 | G/A     | -0.0538 | -0.0702 | 0.0048  |
| 10_123340107_A_G   | 10 | 123340107 | A/G     | 0.1508  | 0.1837  | 0.0053  |
| 10_123340431_GC_G  | 10 | 123340431 | GC/G    | -0.2408 | -0.2913 | -0.0326 |
| 10_123349324_A_T   | 10 | 123349324 | A/T     | -0.2609 | -0.327  | -0.0137 |
| 11_433617_T_C      | 11 | 433617    | T/C     | -0.0437 | -0.0494 | -0.0322 |
| 11_803017_A_G      | 11 | 803017    | A/G     | 0.0457  | 0.04    | 0.0559  |
| 11_1895708_C_A     | 11 | 1895708   | C/A     | -0.0762 | -0.0788 | -0.0538 |
| 11_18664241_T_G    | 11 | 18664241  | T/G     | 0.0461  | 0.0455  | 0.0633  |
| 11_42844441_C_T    | 11 | 42844441  | C/T     | -0.0336 | -0.0334 | -0.0669 |
| 11_44368892_G_A    | 11 | 44368892  | G/A     | 0.0374  | 0.0357  | 0.021   |
| 11_46318032_C_G    | 11 | 46318032  | C/G     | -0.0748 | -0.0693 | -0.0688 |
| 11_65553492_C_A    | 11 | 65553492  | C/A     | 0.0425  | 0.0444  | 0.0305  |
| 11_65572431_G_A    | 11 | 65572431  | G/A     | -0.0347 | -0.0448 | -0.0067 |
| 11_69328130_A_T    | 11 | 69328130  | A/T     | -0.0423 | -0.0538 | 0.0143  |



|                    |    |           |         |         |         |         |
|--------------------|----|-----------|---------|---------|---------|---------|
| 11_69330983_G_A    | 11 | 69330983  | G/A     | 0.1022  | 0.124   | 0.0174  |
| 11_69331418_C_T    | 11 | 69331418  | C/T     | 0.1782  | 0.2018  | 0.0066  |
| 11_103614438_T_G   | 11 | 103614438 | T/G     | 0.0147  | 0.0029  | 0.0676  |
| 11_108267402_C_CA  | 11 | 108267402 | C/CA    | -0.0022 | 0.0141  | -0.0629 |
| 11_111696440_T_C   | 11 | 111696440 | T/C     | -0.0396 | -0.0435 | -0.0122 |
| 11_116727936_A_T   | 11 | 116727936 | A/T     | -0.0423 | -0.0372 | -0.062  |
| 11_122966626_A_G   | 11 | 122966626 | A/G     | -0.0383 | -0.0372 | -0.0484 |
| 11_129243417_T_G   | 11 | 129243417 | T/G     | -0.0543 | -0.0477 | -0.0605 |
| 11_129461016_A_G   | 11 | 129461016 | A/G     | 0.0453  | 0.0401  | 0.0594  |
| 12_293626_A_G      | 12 | 293626    | A/G     | 0.0401  | 0.0371  | 0.039   |
| 12_14413931_G_C    | 12 | 14413931  | G/C     | 0.0484  | 0.0411  | 0.054   |
| 12_28149568_C_T    | 12 | 28149568  | C/T     | -0.0620 | -0.0501 | -0.0683 |
| 12_28174817_C_T    | 12 | 28174817  | C/T     | -0.0856 | -0.083  | -0.101  |
| 12_28347382_C_T    | 12 | 28347382  | C/T     | -0.0521 | -0.0454 | -0.0469 |
| 12_29140260_G_A    | 12 | 29140260  | G/A     | 0.0647  | 0.069   | 0.0753  |
| 12_57146069_T_G    | 12 | 57146069  | T/G     | -0.0579 | -0.0585 | -0.0632 |
| 12_70798355_A_T    | 12 | 70798355  | A/T     | 0.0469  | 0.0471  | 0.015   |
| 12_83064195_G_GA   | 12 | 83064195  | G/GA    | 0.0671  | 0.0645  | 0.0717  |
| 12_85004551_C_T    | 12 | 85004551  | C/T     | 0.0348  | 0.0355  | 0.0358  |
| 12_96027759_A_G    | 12 | 96027759  | A/G     | -0.0867 | -0.0842 | -0.063  |
| 12_103097887_C_T   | 12 | 103097887 | C/T     | 0.0546  | 0.0611  | 0.0149  |
| 12_111600134_G_T   | 12 | 111600134 | G/T     | -0.0442 | -0.0441 | -0.0537 |
| 12_115108136_T_C   | 12 | 115108136 | T/C     | 0.0465  | 0.0533  | 0.0188  |
| 12_115796577_A_G   | 12 | 115796577 | A/G     | -0.0428 | -0.0643 | -0.0148 |
| 12_115835836_T_C   | 12 | 115835836 | T/C     | -0.0813 | -0.0977 | -0.0153 |
| 12_120832146_C_T   | 12 | 120832146 | C/T     | 0.0516  | 0.0534  | 0.0529  |
| 13_32839990_G_A    | 13 | 32839990  | G/A     | 0.0424  | 0.0386  | 0.0759  |
| 13_32972626_A_T    | 13 | 32972626  | A/T     | 0.2687  | 0.2308  | 0.4284  |
| 13_43501356_A_G    | 13 | 43501356  | A/G     | 0.0517  | 0.0458  | 0.0975  |
| 13_73806982_T_C    | 13 | 73806982  | T/C     | 0.0345  | 0.0251  | 0.0653  |
| 13_73960952_A_G    | 13 | 73960952  | A/G     | 0.0399  | 0.0368  | 0.073   |
| 14_37128564_C_A    | 14 | 37128564  | C/A     | -0.0733 | -0.085  | -0.0339 |
| 14_37228504_C_T    | 14 | 37228504  | C/T     | 0.0390  | 0.0408  | 0.0256  |
| 14_68660428_T_C    | 14 | 68660428  | T/C     | -0.0474 | -0.0612 | 0.0245  |
| 14_68979835_T_C    | 14 | 68979835  | T/C     | -0.0911 | -0.0972 | -0.0762 |
| 14_91751788_TC_T   | 14 | 91751788  | TC/T    | 0.0380  | 0.0447  | 0.0091  |
| 14_91841069_A_G    | 14 | 91841069  | A/G     | 0.0513  | 0.0553  | 0.0312  |
| 14_93070286_C_T    | 14 | 93070286  | C/T     | -0.0577 | -0.0519 | -0.0592 |
| 14_105213978_T_G   | 14 | 105213978 | T/G     | 0.0399  | 0.035   | 0.0403  |
| 15_46680811_C_A    | 15 | 46680811  | C/A     | -0.1973 | -0.1823 | -0.2337 |
| 15_50694306_A_G    | 15 | 50694306  | A/G     | -0.0417 | -0.0403 | -0.0392 |
| 15_66630569_G_A    | 15 | 66630569  | G/A     | -0.0369 | -0.0377 | -0.0343 |
| 15_67457698_A_G    | 15 | 67457698  | A/G     | 0.0782  | 0.099   | 0.0141  |
| 15_75750383_T_C    | 15 | 75750383  | T/C     | -0.0413 | -0.0419 | -0.0419 |
| 15_91512267_G_T    | 15 | 91512267  | G/T     | -0.0589 | -0.0557 | -0.0487 |
| 15_100905819_A_C   | 15 | 100905819 | A/C     | -0.0608 | -0.0599 | -0.0746 |
| 16_4008542_CAAAA_C | 16 | 4008542   | CAAAA/C | -0.0329 | -0.0184 | -0.0892 |
| 16_4106788_C_A     | 16 | 4106788   | C/A     | -0.0300 | -0.0182 | -0.0782 |
| 16_6963972_C_G     | 16 | 6963972   | C/G     | 0.0354  | 0.0303  | 0.0811  |
| 16_10706580_G_A    | 16 | 10706580  | G/A     | -0.0740 | -0.0763 | -0.0491 |
| 16_23007047_G_T    | 16 | 23007047  | G/T     | 0.1218  | 0.1363  | 0.0927  |
| 16_52538825_C_A    | 16 | 52538825  | C/A     | 0.1147  | 0.1153  | 0.0917  |
| 16_52599188_C_T    | 16 | 52599188  | C/T     | 0.1070  | 0.1202  | 0.0431  |
| 16_53809123_C_T    | 16 | 53809123  | C/T     | -0.0704 | -0.0651 | -0.0957 |
| 16_53861139_C_T    | 16 | 53861139  | C/T     | -0.0338 | -0.0167 | -0.0782 |
| 16_53861592_G_A    | 16 | 53861592  | G/A     | -0.0337 | -0.0342 | -0.0303 |
| 16_54682064_G_A    | 16 | 54682064  | G/A     | 0.0477  | 0.0554  | 0.0304  |
| 16_80648296_A_G    | 16 | 80648296  | A/G     | 0.0839  | 0.089   | 0.0467  |
| 16_85145977_T_C    | 16 | 85145977  | T/C     | -0.0211 | -0.0044 | -0.0714 |
| 16_87086492_T_C    | 16 | 87086492  | T/C     | -0.0469 | -0.0454 | -0.0374 |
| 17_29168077_G_T    | 17 | 29168077  | G/T     | -0.0568 | -0.0637 | -0.0604 |
| 17_39251123_T_C    | 17 | 39251123  | T/C     | 0.0799  | 0.0631  | 0.1431  |
| 17_40127060_T_C    | 17 | 40127060  | T/C     | 0.0174  | -0.0161 | 0.1511  |
| 17_40485239_G_T    | 17 | 40485239  | G/T     | -0.0571 | -0.0416 | -0.1142 |
| 17_40744470_G_A    | 17 | 40744470  | G/A     | 0.2017  | 0.1917  | 0.1108  |
| 17_43212339_C_CT   | 17 | 43212339  | C/CT    | 0.0438  | 0.0352  | 0.0478  |
| 17_44283858_G_A    | 17 | 44283858  | G/A     | -0.0540 | -0.0532 | -0.0384 |
| 17_53209774_A_C    | 17 | 53209774  | A/C     | -0.0793 | -0.0933 | -0.0365 |
| 17_77781725_A_G    | 17 | 77781725  | A/G     | -0.0401 | -0.0378 | -0.0501 |
| 18_11696613_C_T    | 18 | 11696613  | C/T     | -0.0381 | -0.0281 | -0.094  |
| 18_20634253_C_T    | 18 | 20634253  | C/T     | -0.0415 | -0.0486 | -0.0284 |

|                              |    |          |                 |         |         |         |
|------------------------------|----|----------|-----------------|---------|---------|---------|
| 18_24125857_T_C              | 18 | 24125857 | T/C             | 0.0346  | 0.035   | 0.0231  |
| 18_24337424_C_G              | 18 | 24337424 | C/G             | 0.0455  | 0.0483  | 0.0282  |
| 18_24518050_AT_A             | 18 | 24518050 | AT/A            | -0.0599 | -0.083  | 0.006   |
| 18_25407513_C_G              | 18 | 25407513 | C/G             | 0.0399  | 0.0307  | 0.0648  |
| 18_29981526_G_A              | 18 | 29981526 | G/A             | -0.1058 | -0.0962 | -0.152  |
| 18_42411803_G_C              | 18 | 42411803 | G/C             | -0.0877 | -0.1037 | -0.0189 |
| 18_42888797_T_C              | 18 | 42888797 | T/C             | -0.0542 | -0.0589 | -0.0372 |
| 19_13249921_G_T              | 19 | 13249921 | G/T             | 0.0956  | 0.0924  | 0.069   |
| 19_17393925_C_A              | 19 | 17393925 | C/A             | 0.0378  | 0.0036  | 0.1692  |
| 19_18569492_C_T              | 19 | 18569492 | C/T             | -0.0719 | -0.0778 | -0.0629 |
| 19_19517054_C_CGGGCG         | 19 | 19517054 | C/CGGGCG        | 0.0437  | 0.0442  | 0.0577  |
| 19_44283031_T_C              | 19 | 44283031 | T/C             | 0.0619  | 0.0605  | 0.067   |
| 19_46166073_T_C              | 19 | 46166073 | T/C             | -0.0360 | -0.0447 | -0.0117 |
| 19_55816678_C_T              | 19 | 55816678 | C/T             | -0.0359 | -0.0381 | -0.0346 |
| 20_5948227_G_A               | 20 | 5948227  | G/A             | 0.0760  | 0.0762  | 0.0694  |
| 20_11379842_T_C              | 20 | 11379842 | T/C             | 0.0844  | 0.0998  | 0.0752  |
| 20_41613706_C_G              | 20 | 41613706 | C/G             | 0.0315  | 0.0266  | 0.0784  |
| 20_52296849_G_A              | 20 | 52296849 | G/A             | 0.0440  | 0.0539  | 0.0144  |
| 21_16364756_T_G              | 21 | 16364756 | T/G             | 0.0646  | 0.0742  | 0.0322  |
| 21_16566350_A_G              | 21 | 16566350 | A/G             | 0.0595  | 0.0678  | 0.0172  |
| 21_16574455_C_A              | 21 | 16574455 | C/A             | -0.0707 | -0.0808 | -0.0329 |
| 21_47762932_G_A              | 21 | 47762932 | G/A             | 0.0946  | 0.0852  | 0.089   |
| 22_19766137_C_T              | 22 | 19766137 | C/T             | -0.0367 | -0.0426 | -0.022  |
| 22_29121087_A_G              | 22 | 29121087 | A/G             | 0.1839  | 0.2812  | -0.1566 |
| 22_29135543_G_A              | 22 | 29135543 | G/A             | 0.0654  | 0.0659  | 0.0536  |
| 22_29203724_C_T              | 22 | 29203724 | C/T             | 0.1405  | 0.1793  | 0.0191  |
| 22_29551872_A_G              | 22 | 29551872 | A/G             | -0.1716 | -0.1671 | -0.1318 |
| 22_38583315_AAAAG_AAAAGAAAG* | 22 | 38583315 | AAAAG/AAAAGAAAG | -0.0471 | -0.0608 | 0.0079  |
| 22_39343916_T_A              | 22 | 39343916 | T/A             | 0.0407  | 0.0326  | 0.033   |
| 22_40904707_CT_C             | 22 | 40904707 | CT/C            | 0.1148  | 0.116   | 0.1203  |
| 22_43433100_C_T              | 22 | 43433100 | C/T             | -0.0600 | -0.0585 | -0.0515 |
| 22_45319953_G_A              | 22 | 45319953 | G/A             | -0.0134 | -0.006  | -0.0611 |
| 22_46283297_G_A              | 22 | 46283297 | G/A             | 0.0736  | 0.0719  | 0.0993  |

\*These 7 variants were not available in the UK Biobank

<sup>1</sup>Position build 37

<sup>2</sup>Effect size of the effect allele for overall breast cancer risk, as calculated by Mavaddat et al., 2019 AJHG

<sup>3</sup>Effect size of the effect allele for ER-positive breast cancer risk, as calculated by Mavaddat et al., 2019 AJHG

<sup>4</sup>Effect size of the effect allele for ER-negative breast cancer risk, as calculated by Mavaddat et al., 2019 AJHG

**Supplementary Table 3A:** Mean and SE of the standardized PRS<sub>313</sub><sup>1</sup> across the countries for overall breast cancer in controls of BCAC dataset, and when adjusted for the first 6 and 10 principal components (PCs).

| Country                     | Controls | Controls Onco | Controls iCOGS | Cases  | Total  | Studies                                                                                                                                                  | Mean (SE) PRS <sub>313</sub> adjusted for array <sup>2</sup> | Standard Deviation <sup>3</sup> of the adjusted mean PRS <sub>313</sub> | Mean of raw PRS <sub>313</sub> adjusted for array | SE of raw PRS <sub>313</sub> adjusted for array | Standard Deviation <sup>3</sup> of the adjusted raw mean PRS <sub>313</sub> | Mean of raw PRS <sub>313</sub> (not adjusted for array) | Standard Deviation of the raw mean PRS <sub>313</sub> (not adjusted for array) | Mean (SE) PRS <sub>313</sub> adjusted for 6 PCs and array | Mean (SE) PRS <sub>313</sub> adjusted for 10 PCs and array | Mean PRS <sub>313</sub> Fitted values adjusted for 6 PCs (PRS ~ 6 PCs) <sup>4</sup> |
|-----------------------------|----------|---------------|----------------|--------|--------|----------------------------------------------------------------------------------------------------------------------------------------------------------|--------------------------------------------------------------|-------------------------------------------------------------------------|---------------------------------------------------|-------------------------------------------------|-----------------------------------------------------------------------------|---------------------------------------------------------|--------------------------------------------------------------------------------|-----------------------------------------------------------|------------------------------------------------------------|-------------------------------------------------------------------------------------|
| Australia                   | 4049     | 2375          | 1674           | 4662   | 8711   | ABCFS, ABCTB, BCEES, MCCS, KCONFAB/AOCS                                                                                                                  | -0.005(0.016)                                                | 1.02                                                                    | -0.45                                             | 0.01                                            | 0.636                                                                       | -0.456                                                  | 0.615                                                                          | 0.01(0.017)                                               | 0.01(0.017)                                                | -0.005                                                                              |
| Belarus                     | 342      | 249           | 93             | 744    | 1086   | HMBCS                                                                                                                                                    | 0.07(0.054)                                                  | 1.00                                                                    | -0.404                                            | 0.033                                           | 0.610                                                                       | -0.408                                                  | 0.679                                                                          | 0.071(0.057)                                              | 0.058(0.057)                                               | 0.016                                                                               |
| Belgium                     | 1823     | 1268          | 555            | 3398   | 5221   | LMBC                                                                                                                                                     | -0.006(0.024)                                                | 1.02                                                                    | -0.45                                             | 0.014                                           | 0.598                                                                       | -0.455                                                  | 0.599                                                                          | -0.007(0.024)                                             | 0.002(0.024)                                               | 0.010                                                                               |
| Canada                      | 2277     | 1630          | 647            | 3310   | 5587   | CBCS, MTLGEBCS, OFBCR                                                                                                                                    | 0.018(0.021)                                                 | 1.00                                                                    | -0.435                                            | 0.013                                           | 0.620                                                                       | -0.44                                                   | 0.633                                                                          | 0.019(0.021)                                              | 0.018(0.021)                                               | 0.013                                                                               |
| Denmark                     | 5241     | 716           | 4525           | 4275   | 9516   | CGPS                                                                                                                                                     | -0.013(0.015)                                                | 1.09                                                                    | -0.455                                            | 0.009                                           | 0.652                                                                       | -0.468                                                  | 0.602                                                                          | 0.012(0.017)                                              | 0.013(0.018)                                               | -0.031                                                                              |
| Finland                     | 2083     | 422           | 1661           | 2838   | 4921   | HEBCS, KBBCP, OBBCS                                                                                                                                      | 0.031(0.023)                                                 | 1.05                                                                    | -0.428                                            | 0.014                                           | 0.639                                                                       | -0.44                                                   | 0.605                                                                          | 0.008(0.044)                                              | 0.042(0.044)                                               | 0.010                                                                               |
| France                      | 1372     | 529           | 843            | 1288   | 2660   | CECILE, EPIC                                                                                                                                             | 0.0003(0.027)                                                | 1.00                                                                    | -0.447                                            | 0.017                                           | 0.630                                                                       | -0.456                                                  | 0.611                                                                          | -0.008(0.029)                                             | -0.003(0.029)                                              | 0.008                                                                               |
| Germany                     | 8563     | 4471          | 4092           | 17881  | 26444  | BBCC, BSUCH, EPIC, ESTHER, GC-HBOC, GENICA, GEPARSIXTO, GESBC, HABCS, MARIE, PREFACE, SKKDKFZS, SUCCESSB, SUCCESSC                                       | 0.011(0.011)                                                 | 1.02                                                                    | -0.44                                             | 0.007                                           | 0.648                                                                       | -0.447                                                  | 0.608                                                                          | 0.004(0.013)                                              | 0.008(0.013)                                               | 0.013                                                                               |
| Greece                      | 607      | 512           | 95             | 1252   | 1859   | CCGP, EPIC, TNBCC                                                                                                                                        | 0.232(0.041)                                                 | 1.01                                                                    | -0.305                                            | 0.025                                           | 0.616                                                                       | -0.307                                                  | 0.593                                                                          | 0.043(0.046)                                              | 0.043(0.047)                                               | 0.208                                                                               |
| Ireland                     | 719      | 0             | 719            | 793    | 1512   | BIGGS                                                                                                                                                    | -0.118(0.038)                                                | 1.02                                                                    | -0.519                                            | 0.023                                           | 0.617                                                                       | -0.534                                                  | 0.620                                                                          | -0.015(0.045)                                             | -0.021(0.047)                                              | -0.112                                                                              |
| Israel                      | 724      | 724           | 0              | 1337   | 2061   | BCINIS                                                                                                                                                   | 0.047(0.037)                                                 | 1.00                                                                    | -0.418                                            | 0.023                                           | 0.619                                                                       | -0.418                                                  | 0.651                                                                          | 0.001(0.048)                                              | 0.002(0.048)                                               | 0.062                                                                               |
| Italy                       | 1554     | 1154          | 400            | 1481   | 3035   | EPIC, MBCSG                                                                                                                                              | 0.115(0.025)                                                 | 0.99                                                                    | -0.376                                            | 0.016                                           | 0.631                                                                       | -0.38                                                   | 0.606                                                                          | -0.007(0.03)                                              | 0.007(0.03)                                                | 0.131                                                                               |
| Netherlands                 | 4407     | 1765          | 2642           | 5016   | 9423   | ABCBS, EPIC, ORIGO, RBCS, ABCS-F                                                                                                                         | 0.021(0.016)                                                 | 1.06                                                                    | -0.434                                            | 0.01                                            | 0.664                                                                       | -0.442                                                  | 0.615                                                                          | 0.043(0.017)                                              | 0.049(0.018)                                               | -0.019                                                                              |
| Norway                      | 217      | 0             | 217            | 2386   | 2603   | NBCS                                                                                                                                                     | 0.077(0.068)                                                 | 1.00                                                                    | -0.399                                            | 0.042                                           | 0.619                                                                       | -0.414                                                  | 0.568                                                                          | 0.094(0.069)                                              | 0.085(0.07)                                                | -0.027                                                                              |
| Poland                      | 2554     | 2219          | 335            | 2450   | 5004   | PBCS, SZBCS                                                                                                                                              | 0.013(0.02)                                                  | 1.01                                                                    | -0.439                                            | 0.012                                           | 0.606                                                                       | -0.441                                                  | 0.621                                                                          | 0.025(0.028)                                              | 0.022(0.028)                                               | 0.010                                                                               |
| Republic of North Macedonia | 92       | 92            | 0              | 78     | 170    | MABCS                                                                                                                                                    | 0.25(0.104)                                                  | 1.00                                                                    | -0.294                                            | 0.064                                           | 0.614                                                                       | -0.294                                                  | 0.587                                                                          | 0.134(0.105)                                              | 0.138(0.106)                                               | 0.140                                                                               |
| Russia                      | 120      | 120           | 0              | 211    | 331    | HUBCS                                                                                                                                                    | 0.18(0.091)                                                  | 1.00                                                                    | -0.337                                            | 0.056                                           | 0.613                                                                       | -0.337                                                  | 0.688                                                                          | 0.166(0.093)                                              | 0.1(0.094)                                                 | 0.044                                                                               |
| Spain                       | 2098     | 1227          | 871            | 3124   | 5222   | BREOGAN, EPIC, HCSC, CNIO-BCS                                                                                                                            | 0.057(0.022)                                                 | 1.01                                                                    | -0.412                                            | 0.013                                           | 0.595                                                                       | -0.418                                                  | 0.603                                                                          | -0.006(0.029)                                             | -0.005(0.033)                                              | 0.057                                                                               |
| Sweden                      | 16680    | 9280          | 7400           | 11957  | 28637  | KARBAC, KARMA, MISS, PKARMA, SMC, SASBAC                                                                                                                 | -0.015(0.008)                                                | 1.03                                                                    | -0.456                                            | 0.005                                           | 0.646                                                                       | -0.462                                                  | 0.615                                                                          | 0.005(0.014)                                              | -0.009(0.015)                                              | -0.017                                                                              |
| UK                          | 16854    | 8054          | 8800           | 21331  | 38185  | BBCS, DIETCOMPLYF, EPIC, FHRISK, POSH, PROCAS, SBCS, SEARCH, UKBGS, UKOPS, GLACIER, ICICLE                                                               | -0.01(0.009)                                                 | 1.17                                                                    | -0.453                                            | 0.005                                           | 0.649                                                                       | -0.46                                                   | 0.611                                                                          | 0.019(0.01)                                               | 0.022(0.01)                                                | -0.023                                                                              |
| USA                         | 21696    | 19008         | 2688           | 20448  | 42144  | 2SISTER, AHS, BCFR-NY, BCFR-PA, BCFR-UTAH, CPSII, CTS, MCBCS, MEC, MMHS, MSKCC, NBHS, NC-BCFR, NCBCS, NHS, NHS2, PLCO, SISTER, TNBCC, UBCC, UCIBCS, USRT | 0.029(0.007)                                                 | 1.03                                                                    | -0.429                                            | 0.004                                           | 0.589                                                                       | -0.431                                                  | 0.610                                                                          | 0.033(0.007)                                              | 0.033(0.007)                                               | 0.013                                                                               |
| Total                       | 94072    | 55815         | 38257          | 110260 | 204332 |                                                                                                                                                          |                                                              |                                                                         |                                                   |                                                 |                                                                             |                                                         |                                                                                |                                                           |                                                            |                                                                                     |

<sup>1</sup>PRS was standardized based on the controls of the pooled dataset

<sup>2</sup>Mean PRS<sub>313</sub> was adjusted for array, and results were fitted without an intercept

<sup>3</sup>Standard deviation was calculated using the SE of the adjusted mean PRS using the formula SD=SE\*SQRT(Number\_Controls)

<sup>4</sup>Mean PRS<sub>313</sub> by country using predicted PRS, estimated using linear predictor of PRS vs 6 PCs and the command predict() in R.

**Supplementary Table 3B:** Mean and SE of the standardized PRS<sub>313</sub><sup>1</sup> across the countries for ER-specific breast cancer in controls of BCAC dataset, and when adjusted for the first 6 or 10 principal components (PCs).

| Country                     | Controls | Controls Onco | Controls iCOGS | Cases | Total | Studies                                                                                                                                                  | ER-positive                                                  |                                                           | ER-negative                                                  |                                                            |
|-----------------------------|----------|---------------|----------------|-------|-------|----------------------------------------------------------------------------------------------------------------------------------------------------------|--------------------------------------------------------------|-----------------------------------------------------------|--------------------------------------------------------------|------------------------------------------------------------|
|                             |          |               |                |       |       |                                                                                                                                                          | Mean (SE) PRS <sub>313</sub> adjusted for array <sup>2</sup> | Mean (SE) PRS <sub>313</sub> adjusted for 6 PCs and array | Mean (SE) PRS <sub>313</sub> adjusted for array <sup>2</sup> | Mean (SE) PRS <sub>313</sub> adjusted for 10 PCs and array |
| Australia                   | 4049     | 2375          | 1674           | 4662  | 8711  | ABCFS, ABCTB, BCEES, MCCS, KCONFAB/AOCS                                                                                                                  | 0.001(0.016)                                                 | 0.015(0.017)                                              | -0.029(0.016)                                                | -0.016(0.017)                                              |
| Belarus                     | 342      | 249           | 93             | 744   | 1086  | HMBCS                                                                                                                                                    | 0.062(0.054)                                                 | 0.06(0.057)                                               | 0.116(0.054)                                                 | 0.104(0.057)                                               |
| Belgium                     | 1823     | 1268          | 555            | 3398  | 5221  | LMBC                                                                                                                                                     | 0.001(0.024)                                                 | -0.001(0.024)                                             | -0.033(0.024)                                                | -0.016(0.024)                                              |
| Canada                      | 2277     | 1630          | 647            | 3310  | 5587  | CBBCS, MTLGEBCS, OFBCR                                                                                                                                   | 0.02(0.021)                                                  | 0.019(0.021)                                              | 0.003(0.021)                                                 | 0.011(0.021)                                               |
| Denmark                     | 5241     | 716           | 4525           | 4275  | 9516  | CGPS                                                                                                                                                     | -0.021(0.015)                                                | 0.008(0.017)                                              | 0.027(0.015)                                                 | 0.022(0.018)                                               |
| Finland                     | 2083     | 422           | 1661           | 2838  | 4921  | HEBCS, KBCP, OBCS                                                                                                                                        | 0.031(0.023)                                                 | 0.022(0.044)                                              | 0.021(0.023)                                                 | -0.019(0.044)                                              |
| France                      | 1372     | 529           | 843            | 1288  | 2660  | CECILE, EPIC                                                                                                                                             | 0.008(0.027)                                                 | -0.005(0.029)                                             | -0.045(0.027)                                                | -0.026(0.029)                                              |
| Germany                     | 8563     | 4471          | 4092           | 17881 | 26444 | BBCC, BSUCH, EPIC, ESTHER, GC-HBOC, GENICA, GEPARSIXTO, GESBC, HABCS, MARIE, PREFACE, SKKDKFZS, SUCCESSB, SUCCESSC                                       | 0.017(0.011)                                                 | 0.008(0.013)                                              | -0.02(0.011)                                                 | -0.012(0.013)                                              |
| Greece                      | 607      | 512           | 95             | 1252  | 1859  | CCGP, EPIC, TNBCC                                                                                                                                        | 0.257(0.041)                                                 | 0.057(0.046)                                              | 0.029(0.041)                                                 | -0.017(0.047)                                              |
| Ireland                     | 719      | 0             | 719            | 793   | 1512  | BIGGS                                                                                                                                                    | -0.122(0.038)                                                | -0.018(0.045)                                             | -0.086(0.038)                                                | -0.019(0.047)                                              |
| Israel                      | 724      | 724           | 0              | 1337  | 2061  | BCINIS                                                                                                                                                   | 0.049(0.037)                                                 | 0.003(0.048)                                              | -0.05(0.037)                                                 | -0.01(0.048)                                               |
| Italy                       | 1554     | 1154          | 400            | 1481  | 3035  | EPIC, MBCSG                                                                                                                                              | 0.136(0.025)                                                 | 0.002(0.03)                                               | -0.029(0.025)                                                | -0.03(0.03)                                                |
| Netherlands                 | 4407     | 1765          | 2642           | 5016  | 9423  | ABCS, EPIC, ORIGO, RBCS, ABCS-F                                                                                                                          | 0.02(0.016)                                                  | 0.043(0.017)                                              | 0.036(0.016)                                                 | 0.051(0.018)                                               |
| Norway                      | 217      | 0             | 217            | 2386  | 2603  | NBCS                                                                                                                                                     | 0.059(0.068)                                                 | 0.083(0.069)                                              | 0.118(0.068)                                                 | 0.077(0.07)                                                |
| Poland                      | 2554     | 2219          | 335            | 2450  | 5004  | PBCS, SZBCS                                                                                                                                              | 0.017(0.02)                                                  | 0.026(0.028)                                              | 0.002(0.02)                                                  | 0.007(0.028)                                               |
| Republic of North Macedonia | 92       | 92            | 0              | 78    | 170   | MABCS                                                                                                                                                    | 0.257(0.104)                                                 | 0.134(0.105)                                              | 0.168(0.104)                                                 | 0.145(0.106)                                               |
| Russia                      | 120      | 120           | 0              | 211   | 331   | HUBCS                                                                                                                                                    | 0.159(0.091)                                                 | 0.147(0.093)                                              | 0.232(0.091)                                                 | 0.147(0.094)                                               |
| Spain                       | 2098     | 1227          | 871            | 3124  | 5222  | BREOGAN, EPIC, HCSC, CNIO-BCS                                                                                                                            | 0.065(0.022)                                                 | -0.008(0.029)                                             | 0.006(0.022)                                                 | 0.002(0.033)                                               |
| Sweden                      | 16680    | 9280          | 7400           | 11957 | 28637 | KARBAC, KARMA, MISS, PKARMA, SMC, SASBAC                                                                                                                 | -0.019(0.008)                                                | 0.007(0.014)                                              | 0.001(0.008)                                                 | -0.044(0.015)                                              |
| UK                          | 16854    | 8054          | 8800           | 21331 | 38185 | BBCS, DIETCOMPLYF, EPIC, FHRISK, POSH, PROCAS, SBCS, SEARCH, UKBGS, UKOPS, GLACIER, ICICLE                                                               | -0.011(0.009)                                                | 0.018(0.01)                                               | 0.006(0.009)                                                 | 0.025(0.01)                                                |
| USA                         | 21696    | 19008         | 2688           | 20448 | 42144 | 2SISTER, AHS, BCFR-NY, BCFR-PA, BCFR-UTAH, CPSII, CTS, MCBCS, MEC, MMHS, MSKCC, NBHS, NC-BCFR, NCBCS, NHS, NHS2, PLCO, SISTER, TNBCC, UBBS, UCIBCS, USRT | 0.029(0.007)                                                 | 0.033(0.007)                                              | 0.025(0.007)                                                 | 0.028(0.007)                                               |

<sup>1</sup>PRS was standardized based on the controls of the pooled dataset

<sup>2</sup>Mean PRS<sub>313</sub> was adjusted for array, and results were fitted without an intercept

**Supplementary Table 4:** Mean and SE of the standardized PRS<sub>306</sub><sup>1</sup> and when adjusted for the first 8 or 10 principal components (PCs), and of the standard PRS (as defined by the UK Biobank) across the countries for overall breast cancer, in white females participating in the UK Biobank.

| Country              | Mean (SE) PRS <sub>306</sub> | Mean (SE) PRS <sub>306</sub> adjusted for 8 PCs | Mean (SE) PRS <sub>306</sub> adjusted for 10 PCs | Mean (SE) standard PRS |
|----------------------|------------------------------|-------------------------------------------------|--------------------------------------------------|------------------------|
| Australia            | 0.009 (0.044)                | 0.051 (0.045)                                   | 0.05 (0.045)                                     | 0.042 (0.044)          |
| Austria              | -0.048 (0.092)               | -0.048 (0.093)                                  | -0.046 (0.093)                                   | -0.046 (0.092)         |
| Canada               | 0.057 (0.048)                | 0.097 (0.049)                                   | 0.096 (0.049)                                    | 0.021 (0.048)          |
| Cyprus               | 0.274 (0.087)                | 0.195 (0.089)                                   | 0.187 (0.089)                                    | 0.404 (0.087)          |
| Denmark              | 0.159 (0.081)                | 0.199 (0.082)                                   | 0.195 (0.082)                                    | 0.056 (0.081)          |
| Finland              | 0.026 (0.088)                | 0.014 (0.092)                                   | 0.012 (0.092)                                    | -0.192 (0.088)         |
| France               | -0.008 (0.043)               | -0.007 (0.045)                                  | 0 (0.045)                                        | 0.053 (0.043)          |
| Germany              | 0.03 (0.028)                 | 0.052 (0.03)                                    | 0.053 (0.03)                                     | -0.06 (0.028)          |
| Ireland              | -0.041 (0.02)                | 0.036 (0.023)                                   | 0.031 (0.023)                                    | 0.024 (0.02)           |
| Italy                | 0.191 (0.054)                | 0.098 (0.058)                                   | 0.098 (0.058)                                    | 0.364 (0.054)          |
| Malta                | 0.193 (0.078)                | 0.158 (0.079)                                   | 0.157 (0.079)                                    | 0.319 (0.078)          |
| Netherlands          | 0.007 (0.057)                | 0.044 (0.058)                                   | 0.041 (0.058)                                    | -0.095 (0.057)         |
| New Zealand          | -0.02 (0.052)                | 0.029 (0.053)                                   | 0.027 (0.053)                                    | 0.071 (0.052)          |
| Poland               | 0.124 (0.05)                 | 0.108 (0.057)                                   | 0.117 (0.057)                                    | -0.133 (0.05)          |
| Portugal             | 0.184 (0.075)                | 0.105 (0.076)                                   | 0.117 (0.077)                                    | 0.265 (0.075)          |
| Russia               | 0.267 (0.092)                | 0.224 (0.096)                                   | 0.228 (0.096)                                    | -0.082 (0.092)         |
| Spain                | 0.095 (0.071)                | 0.045 (0.072)                                   | 0.059 (0.074)                                    | 0.106 (0.071)          |
| Sweden               | -0.008 (0.084)               | 0.027 (0.085)                                   | 0.022 (0.085)                                    | -0.26 (0.084)          |
| Switzerland          | 0.013 (0.091)                | 0.012 (0.092)                                   | 0.013 (0.092)                                    | 0.127 (0.091)          |
| UK, England          | 0 (0.002)                    | 0.047 (0.009)                                   | 0.046 (0.009)                                    | -0.007 (0.002)         |
| UK, Northern Ireland | 0.015 (0.026)                | 0.081 (0.028)                                   | 0.074 (0.028)                                    | 0.034 (0.026)          |
| UK, Scotland         | -0.002 (0.007)               | 0.059 (0.012)                                   | 0.052 (0.012)                                    | 0.031 (0.007)          |
| UK, Wales            | -0.022 (0.01)                | 0.028 (0.013)                                   | 0.052 (0.014)                                    | 0.027 (0.01)           |
| USA                  | -0.013 (0.035)               | 0.013 (0.036)                                   | 0.013 (0.036)                                    | 0.06 (0.035)           |

<sup>1</sup>PRS was standardized based on the controls

**Supplementary Table 5:** Mean frequency and standard deviation of each variant in the PRS<sub>313</sub> across the countries and coefficient of variation.

| SNP name          | Mean Frequency | Standard Deviation | Coefficient of variation |
|-------------------|----------------|--------------------|--------------------------|
| 22_29121087_A_G   | 0.009          | 0.015              | 1.662                    |
| 13_32839990_G_A   | 0.017          | 0.012              | 0.692                    |
| 5_122705244_C_T   | 0.036          | 0.021              | 0.586                    |
| 5_1353077_T_C     | 0.008          | 0.005              | 0.536                    |
| 6_27425644_G_C    | 0.067          | 0.032              | 0.473                    |
| 22_29135543_G_A   | 0.090          | 0.037              | 0.410                    |
| 10_22477776_ACC_A | 0.019          | 0.008              | 0.403                    |
| 3_29294845_C_T    | 0.013          | 0.005              | 0.389                    |
| 18_29981526_G_A   | 0.047          | 0.018              | 0.380                    |
| 3_55970777_A_AT   | 0.026          | 0.010              | 0.370                    |
| 19_13249921_G_T   | 0.041          | 0.014              | 0.345                    |
| 21_47762932_G_A   | 0.036          | 0.012              | 0.343                    |
| 4_38784633_G_T    | 0.260          | 0.088              | 0.339                    |
| 17_40744470_G_A   | 0.011          | 0.004              | 0.331                    |
| 1_121287994_A_G   | 0.113          | 0.036              | 0.319                    |
| 15_46680811_C_A   | 0.011          | 0.004              | 0.313                    |
| 1_201437832_C_T   | 0.055          | 0.017              | 0.311                    |
| 22_29203724_C_T   | 0.022          | 0.006              | 0.296                    |
| 5_345109_T_C      | 0.051          | 0.014              | 0.280                    |
| 20_5948227_G_A    | 0.065          | 0.018              | 0.276                    |
| 6_152055978_A_T   | 0.063          | 0.017              | 0.274                    |
| 1_242034263_A_G   | 0.030          | 0.008              | 0.272                    |
| 5_56042972_C_T    | 0.050          | 0.013              | 0.267                    |
| 8_36858483_A_G    | 0.199          | 0.053              | 0.265                    |
| 1_41389220_T_C    | 0.015          | 0.004              | 0.261                    |
| 17_44283858_G_A   | 0.177          | 0.046              | 0.258                    |
| 21_16566350_A_G   | 0.086          | 0.022              | 0.258                    |
| 10_123349324_A_T  | 0.054          | 0.014              | 0.253                    |
| 13_32972626_A_T   | 0.008          | 0.002              | 0.251                    |
| 5_44508264_G_GT   | 0.136          | 0.034              | 0.247                    |
| 16_23007047_G_T   | 0.025          | 0.006              | 0.236                    |
| 7_98005235_G_A    | 0.159          | 0.037              | 0.235                    |
| 10_123340107_A_G  | 0.072          | 0.017              | 0.232                    |
| 15_67457698_A_G   | 0.046          | 0.011              | 0.229                    |
| 6_151955914_A_G   | 0.075          | 0.017              | 0.228                    |
| 3_63887449_T_TTG  | 0.120          | 0.027              | 0.225                    |
| 9_98362587_T_C    | 0.094          | 0.021              | 0.218                    |
| 3_87037543_A_G    | 0.087          | 0.019              | 0.216                    |
| 8_76333056_C_T    | 0.091          | 0.019              | 0.212                    |
| 11_69331418_C_T   | 0.072          | 0.015              | 0.212                    |
| 9_110837073_A_G   | 0.066          | 0.014              | 0.210                    |
| 8_129199566_G_A   | 0.184          | 0.038              | 0.208                    |
| 6_43227141_G_A    | 0.097          | 0.020              | 0.207                    |
| 12_28149568_C_T   | 0.111          | 0.022              | 0.200                    |
| 22_40904707_CT_C  | 0.113          | 0.023              | 0.200                    |

|                   |       |       |       |
|-------------------|-------|-------|-------|
| 22_39343916_T_A   | 0.251 | 0.049 | 0.197 |
| 2_217955896_GA_G  | 0.038 | 0.007 | 0.193 |
| 8_102483100_T_C   | 0.096 | 0.018 | 0.189 |
| 1_168171052_CA_C  | 0.112 | 0.021 | 0.187 |
| 7_28869017_G_A    | 0.108 | 0.020 | 0.187 |
| 2_70172587_G_A    | 0.277 | 0.052 | 0.187 |
| 3_46888198_T_C    | 0.102 | 0.019 | 0.187 |
| 11_46318032_C_G   | 0.063 | 0.012 | 0.185 |
| 17_40127060_T_C   | 0.054 | 0.010 | 0.183 |
| 5_79180995_G_GA   | 0.171 | 0.031 | 0.180 |
| 3_4742251_A_G     | 0.359 | 0.065 | 0.180 |
| 22_43433100_C_T   | 0.109 | 0.020 | 0.179 |
| 15_75750383_T_C   | 0.271 | 0.048 | 0.179 |
| 22_46283297_G_A   | 0.114 | 0.020 | 0.178 |
| 16_53861592_G_A   | 0.366 | 0.065 | 0.178 |
| 17_43212339_C_CT  | 0.233 | 0.041 | 0.176 |
| 4_143467195_C_T   | 0.110 | 0.019 | 0.174 |
| 11_116727936_A_T  | 0.203 | 0.035 | 0.173 |
| 2_10138983_T_C    | 0.112 | 0.019 | 0.173 |
| 12_120832146_C_T  | 0.163 | 0.027 | 0.168 |
| 5_52679539_C_CA   | 0.103 | 0.017 | 0.166 |
| 12_115796577_A_G  | 0.198 | 0.033 | 0.166 |
| 17_40485239_G_T   | 0.082 | 0.014 | 0.165 |
| 12_103097887_C_T  | 0.117 | 0.019 | 0.165 |
| 5_44619502_A_G    | 0.151 | 0.025 | 0.163 |
| 3_27388664_C_G    | 0.280 | 0.045 | 0.160 |
| 2_29179452_G_C    | 0.230 | 0.035 | 0.150 |
| 4_106069013_G_T   | 0.238 | 0.035 | 0.149 |
| 22_19766137_C_T   | 0.396 | 0.058 | 0.147 |
| 18_42411803_G_C   | 0.074 | 0.011 | 0.146 |
| 8_120862186_A_G   | 0.136 | 0.020 | 0.145 |
| 4_175842495_G_A   | 0.113 | 0.016 | 0.145 |
| 3_49709912_C_CT   | 0.297 | 0.043 | 0.144 |
| 6_85912194_CAA_C  | 0.058 | 0.008 | 0.144 |
| 14_68979835_T_C   | 0.250 | 0.036 | 0.144 |
| 7_101552440_G_A   | 0.114 | 0.016 | 0.143 |
| 3_141112859_CTT_C | 0.389 | 0.055 | 0.140 |
| 11_108267402_C_CA | 0.434 | 0.060 | 0.138 |
| 10_64299890_A_G   | 0.166 | 0.023 | 0.138 |
| 9_110303808_TAA_T | 0.216 | 0.030 | 0.137 |
| 15_100905819_A_C  | 0.110 | 0.015 | 0.136 |
| 1_155556971_G_A   | 0.224 | 0.030 | 0.136 |
| 18_11696613_C_T   | 0.145 | 0.020 | 0.136 |
| 20_52296849_G_A   | 0.241 | 0.032 | 0.135 |
| 1_88156923_G_A    | 0.146 | 0.020 | 0.134 |
| 5_132407058_C_T   | 0.232 | 0.031 | 0.134 |
| 10_5794652_A_G    | 0.208 | 0.027 | 0.132 |
| 17_39251123_T_C   | 0.064 | 0.008 | 0.132 |
| 2_121089731_T_C   | 0.194 | 0.026 | 0.132 |
| 3_172285237_G_A   | 0.213 | 0.028 | 0.131 |



|                  |       |       |       |
|------------------|-------|-------|-------|
| 9_136146597_C_T  | 0.269 | 0.035 | 0.131 |
| 3_30684907_C_T   | 0.306 | 0.039 | 0.129 |
| 10_123095209_G_A | 0.340 | 0.044 | 0.129 |
| 1_46670206_TC_T  | 0.285 | 0.037 | 0.128 |
| 9_6880263_A_G    | 0.288 | 0.037 | 0.127 |
| 1_220671050_C_T  | 0.241 | 0.030 | 0.126 |
| 12_83064195_G_GA | 0.101 | 0.013 | 0.124 |
| 12_57146069_T_G  | 0.104 | 0.013 | 0.122 |
| 7_91459189_A_ATT | 0.333 | 0.041 | 0.122 |
| 1_118141492_A_C  | 0.269 | 0.033 | 0.122 |
| 6_149595505_T_C  | 0.208 | 0.025 | 0.121 |
| 5_173358154_G_A  | 0.403 | 0.048 | 0.119 |
| 15_50694306_A_G  | 0.352 | 0.042 | 0.119 |
| 7_21940960_A_G   | 0.348 | 0.041 | 0.119 |
| 5_81512947_TA_T  | 0.247 | 0.029 | 0.119 |
| 1_114445880_G_A  | 0.166 | 0.020 | 0.117 |
| 1_51467096_CT_C  | 0.481 | 0.056 | 0.117 |
| 11_69330983_G_A  | 0.122 | 0.014 | 0.116 |
| 12_14413931_G_C  | 0.261 | 0.030 | 0.116 |
| 7_25569548_C_T   | 0.168 | 0.019 | 0.116 |
| 12_111600134_G_T | 0.375 | 0.043 | 0.116 |
| 5_56045081_T_C   | 0.166 | 0.019 | 0.115 |
| 6_151949806_A_C  | 0.306 | 0.035 | 0.114 |
| 5_71965007_G_A   | 0.248 | 0.028 | 0.114 |
| 12_70798355_A_T  | 0.177 | 0.020 | 0.114 |
| 8_106358620_A_T  | 0.101 | 0.012 | 0.114 |
| 2_29615233_T_C   | 0.274 | 0.031 | 0.114 |
| 10_80886726_A_G  | 0.166 | 0.019 | 0.113 |
| 13_73806982_T_C  | 0.304 | 0.034 | 0.112 |
| 1_203770448_T_A  | 0.267 | 0.030 | 0.111 |
| 5_55662540_C_CT  | 0.366 | 0.040 | 0.110 |
| 16_80648296_A_G  | 0.237 | 0.026 | 0.110 |
| 11_69328130_A_T  | 0.214 | 0.023 | 0.110 |
| 1_7917076_G_A    | 0.381 | 0.042 | 0.109 |
| 1_88428199_C_A   | 0.247 | 0.027 | 0.109 |
| 1_217220574_G_A  | 0.209 | 0.022 | 0.106 |
| 16_87086492_T_C  | 0.256 | 0.027 | 0.105 |
| 11_803017_A_G    | 0.509 | 0.053 | 0.105 |
| 10_64819996_G_T  | 0.198 | 0.021 | 0.104 |
| 6_152432902_C_T  | 0.520 | 0.054 | 0.104 |
| 11_65553492_C_A  | 0.179 | 0.019 | 0.104 |
| 11_42844441_C_T  | 0.322 | 0.033 | 0.104 |
| 16_10706580_G_A  | 0.069 | 0.007 | 0.104 |
| 5_104300273_G_T  | 0.182 | 0.019 | 0.103 |
| 15_91512267_G_T  | 0.139 | 0.014 | 0.103 |
| 19_18569492_C_T  | 0.341 | 0.035 | 0.102 |
| 2_218714845_G_A  | 0.373 | 0.038 | 0.102 |
| 3_189774456_C_T  | 0.216 | 0.022 | 0.102 |
| 12_115108136_T_C | 0.267 | 0.027 | 0.102 |
| 5_77155397_GT_G  | 0.349 | 0.035 | 0.101 |

|                      |       |       |       |
|----------------------|-------|-------|-------|
| 5_90789470_G_A       | 0.164 | 0.016 | 0.101 |
| 5_169591460_T_C      | 0.342 | 0.034 | 0.100 |
| 7_94113799_T_C       | 0.273 | 0.027 | 0.100 |
| 6_16399557_C_T       | 0.339 | 0.034 | 0.099 |
| 9_110837176_C_T      | 0.164 | 0.016 | 0.097 |
| 14_93070286_C_T      | 0.170 | 0.016 | 0.096 |
| 6_169006947_C_G      | 0.533 | 0.051 | 0.095 |
| 5_1296255_A_AG       | 0.301 | 0.029 | 0.095 |
| 12_28347382_C_T      | 0.206 | 0.019 | 0.094 |
| 9_22041998_C_G       | 0.140 | 0.013 | 0.093 |
| 4_175847436_C_A      | 0.336 | 0.031 | 0.093 |
| 5_44706498_A_G       | 0.247 | 0.023 | 0.093 |
| 7_144048902_G_T      | 0.227 | 0.021 | 0.092 |
| 1_149906413_T_C      | 0.396 | 0.036 | 0.091 |
| 1_208076291_G_A      | 0.326 | 0.030 | 0.091 |
| 22_45319953_G_A      | 0.418 | 0.038 | 0.091 |
| 2_121159205_G_A      | 0.338 | 0.031 | 0.091 |
| 8_23663653_C_A       | 0.394 | 0.035 | 0.090 |
| 7_55192256_A_C       | 0.536 | 0.048 | 0.089 |
| 8_124563705_T_C      | 0.150 | 0.013 | 0.088 |
| 2_172974566_C_G      | 0.462 | 0.040 | 0.087 |
| 8_170692_T_C         | 0.220 | 0.019 | 0.087 |
| 12_28174817_C_T      | 0.239 | 0.021 | 0.086 |
| 17_29168077_G_T      | 0.267 | 0.023 | 0.085 |
| 1_10566215_A_G       | 0.321 | 0.027 | 0.085 |
| 16_53809123_C_T      | 0.429 | 0.036 | 0.084 |
| 9_21964882_CAAA_C    | 0.314 | 0.026 | 0.083 |
| 16_52538825_C_A      | 0.263 | 0.022 | 0.083 |
| 5_1279790_C_T        | 0.266 | 0.022 | 0.083 |
| 17_53209774_A_C      | 0.294 | 0.024 | 0.083 |
| 7_130656911_C_T      | 0.362 | 0.030 | 0.083 |
| 16_52599188_C_T      | 0.249 | 0.020 | 0.082 |
| 10_71335574_C_T      | 0.301 | 0.025 | 0.082 |
| 5_131640536_A_G      | 0.535 | 0.043 | 0.080 |
| 12_85004551_C_T      | 0.507 | 0.041 | 0.080 |
| 19_17393925_C_A      | 0.289 | 0.023 | 0.079 |
| 1_172328767_T_TA     | 0.324 | 0.025 | 0.079 |
| 5_56023083_T_G       | 0.153 | 0.012 | 0.078 |
| 7_99948655_T_G       | 0.216 | 0.017 | 0.078 |
| 6_21923810_T_C       | 0.429 | 0.033 | 0.077 |
| 19_19517054_C_CGGGCG | 0.361 | 0.028 | 0.076 |
| 8_76378165_G_T       | 0.363 | 0.027 | 0.076 |
| 10_38523626_C_A      | 0.361 | 0.027 | 0.075 |
| 1_145604302_C_CT     | 0.344 | 0.026 | 0.075 |
| 21_16364756_T_G      | 0.167 | 0.012 | 0.074 |
| 6_152023191_G_A      | 0.393 | 0.029 | 0.073 |
| 21_16574455_C_A      | 0.320 | 0.023 | 0.072 |
| 18_24518050_AT_A     | 0.280 | 0.020 | 0.072 |
| 2_19315675_T_A       | 0.547 | 0.039 | 0.071 |
| 1_100880328_A_T      | 0.407 | 0.029 | 0.071 |

|                             |       |       |       |
|-----------------------------|-------|-------|-------|
| 5_44853593_G_C              | 0.303 | 0.021 | 0.070 |
| 15_66630569_G_A             | 0.626 | 0.043 | 0.069 |
| 1_202184600_C_T             | 0.397 | 0.027 | 0.069 |
| 1_121280613_A_G             | 0.407 | 0.028 | 0.069 |
| 5_32579616_TCA_T            | 0.475 | 0.033 | 0.069 |
| 14_37128564_C_A             | 0.210 | 0.014 | 0.068 |
| 22_38583315_AAAAG_AAAAGAAAG | 0.286 | 0.019 | 0.068 |
| 8_128370949_C_G             | 0.410 | 0.028 | 0.068 |
| 7_130674481_G_A             | 0.299 | 0.020 | 0.068 |
| 2_121058254_A_G             | 0.707 | 0.048 | 0.067 |
| 9_119313486_A_G             | 0.397 | 0.027 | 0.067 |
| 19_55816678_C_T             | 0.356 | 0.023 | 0.064 |
| 19_44283031_T_C             | 0.345 | 0.022 | 0.064 |
| 4_89240476_G_A              | 0.446 | 0.029 | 0.064 |
| 6_87803819_T_C              | 0.271 | 0.017 | 0.064 |
| 7_139943702_CT_C            | 0.529 | 0.034 | 0.063 |
| 11_1895708_C_A              | 0.398 | 0.025 | 0.063 |
| 16_4106788_C_A              | 0.240 | 0.015 | 0.062 |
| 8_128213561_C_CA            | 0.409 | 0.025 | 0.062 |
| 11_65572431_G_A             | 0.497 | 0.030 | 0.061 |
| 10_22032942_A_G             | 0.702 | 0.043 | 0.061 |
| 10_114777670_C_T            | 0.462 | 0.028 | 0.060 |
| 2_25129473_A_G              | 0.403 | 0.024 | 0.060 |
| 8_128372172_A_G             | 0.561 | 0.033 | 0.060 |
| 12_115835836_T_C            | 0.414 | 0.025 | 0.059 |
| 5_73234583_T_C              | 0.327 | 0.019 | 0.059 |
| 6_82263549_AAT_A            | 0.438 | 0.026 | 0.059 |
| 3_71620370_T_G              | 0.632 | 0.036 | 0.057 |
| 12_96027759_A_G             | 0.296 | 0.017 | 0.057 |
| 1_204502514_T_TTCTGAAACAGGG | 0.806 | 0.046 | 0.057 |
| 11_44368892_G_A             | 0.548 | 0.031 | 0.057 |
| 18_24337424_C_G             | 0.616 | 0.035 | 0.057 |
| 5_16231194_G_C              | 0.560 | 0.032 | 0.057 |
| 3_99403877_G_A              | 0.483 | 0.027 | 0.057 |
| 9_110885479_C_T             | 0.637 | 0.036 | 0.057 |
| 11_129461016_A_G            | 0.608 | 0.034 | 0.056 |
| 2_88358825_G_C              | 0.318 | 0.018 | 0.056 |
| 1_217053815_T_G             | 0.323 | 0.018 | 0.056 |
| 3_59373745_C_T              | 0.422 | 0.024 | 0.056 |
| 5_158244083_C_T             | 0.574 | 0.032 | 0.056 |
| 12_293626_A_G               | 0.389 | 0.021 | 0.055 |
| 16_85145977_T_C             | 0.478 | 0.026 | 0.055 |
| 14_68660428_T_C             | 0.821 | 0.045 | 0.054 |
| 4_84370124_TAA_TA           | 0.533 | 0.029 | 0.054 |
| 10_13892298_G_A             | 0.438 | 0.024 | 0.054 |
| 9_87782211_T_C              | 0.516 | 0.028 | 0.054 |
| 7_102481842_T_C             | 0.345 | 0.018 | 0.053 |
| 18_24125857_T_C             | 0.419 | 0.022 | 0.053 |
| 10_80851257_G_T             | 0.625 | 0.033 | 0.053 |
| 14_105213978_T_G            | 0.467 | 0.025 | 0.053 |

|                       |       |       |       |
|-----------------------|-------|-------|-------|
| 8_23447496_A_G        | 0.656 | 0.035 | 0.053 |
| 5_176134882_T_C       | 0.534 | 0.028 | 0.052 |
| 14_37228504_C_T       | 0.424 | 0.022 | 0.052 |
| 10_123340431_GC_G     | 0.596 | 0.031 | 0.052 |
| 9_36928288_T_C        | 0.536 | 0.028 | 0.052 |
| 4_187503758_A_T       | 0.446 | 0.023 | 0.052 |
| 4_126752992_A_AAT     | 0.519 | 0.026 | 0.051 |
| 17_77781725_A_G       | 0.501 | 0.025 | 0.050 |
| 2_217920769_G_T       | 0.491 | 0.024 | 0.050 |
| 9_129424719_A_G       | 0.454 | 0.023 | 0.050 |
| 6_20537845_CA_C       | 0.467 | 0.023 | 0.049 |
| 4_92594859_TTCTTC_T   | 0.445 | 0.022 | 0.049 |
| 6_18783140_G_A        | 0.617 | 0.030 | 0.048 |
| 13_73960952_A_G       | 0.761 | 0.036 | 0.048 |
| 11_18664241_T_G       | 0.710 | 0.034 | 0.047 |
| 18_42888797_T_C       | 0.346 | 0.016 | 0.047 |
| 11_103614438_T_G      | 0.657 | 0.031 | 0.047 |
| 5_58241712_C_T        | 0.580 | 0.027 | 0.046 |
| 8_124571581_G_A       | 0.420 | 0.019 | 0.046 |
| 11_122966626_A_G      | 0.287 | 0.013 | 0.045 |
| 14_91751788_TC_T      | 0.698 | 0.031 | 0.044 |
| 8_117209548_A_G       | 0.639 | 0.028 | 0.044 |
| 1_120257110_T_C       | 0.531 | 0.023 | 0.044 |
| 8_124739913_T_G       | 0.400 | 0.018 | 0.044 |
| 4_151218296_CATATTT_C | 0.655 | 0.029 | 0.044 |
| 8_17787610_CT_C       | 0.611 | 0.027 | 0.044 |
| 5_2777029_G_A         | 0.412 | 0.018 | 0.044 |
| 18_20634253_C_T       | 0.640 | 0.027 | 0.042 |
| 9_110849525_G_T       | 0.613 | 0.025 | 0.042 |
| 6_170332621_T_C       | 0.605 | 0.025 | 0.041 |
| 16_6963972_C_G        | 0.777 | 0.032 | 0.041 |
| 5_44649944_C_T        | 0.600 | 0.024 | 0.041 |
| 3_27353716_C_A        | 0.531 | 0.021 | 0.040 |
| 2_202204741_T_C       | 0.708 | 0.028 | 0.040 |
| 14_91841069_A_G       | 0.340 | 0.014 | 0.040 |
| 8_143669254_A_G       | 0.355 | 0.014 | 0.039 |
| 19_46166073_T_C       | 0.620 | 0.023 | 0.038 |
| 11_433617_T_C         | 0.817 | 0.030 | 0.036 |
| 11_111696440_T_C      | 0.628 | 0.022 | 0.035 |
| 1_41380440_C_T        | 0.651 | 0.022 | 0.034 |
| 16_53861139_C_T       | 0.757 | 0.025 | 0.033 |
| 5_122478676_C_A       | 0.740 | 0.024 | 0.033 |
| 8_29509616_A_C        | 0.671 | 0.022 | 0.033 |
| 6_13713366_G_C        | 0.567 | 0.018 | 0.033 |
| 5_55965167_C_T        | 0.565 | 0.018 | 0.032 |
| 20_41613706_C_G       | 0.805 | 0.025 | 0.031 |
| 16_54682064_G_A       | 0.488 | 0.015 | 0.031 |
| 1_18807339_T_C        | 0.523 | 0.016 | 0.031 |
| 8_76230943_A_G        | 0.830 | 0.024 | 0.029 |
| 6_130341728_C_CT      | 0.724 | 0.020 | 0.028 |

|                       |       |       |       |
|-----------------------|-------|-------|-------|
| 10_115128491_T_C      | 0.777 | 0.021 | 0.027 |
| 10_95292187_CAA_C     | 0.829 | 0.022 | 0.026 |
| 16_4008542_CAAAAA_C   | 0.822 | 0.021 | 0.026 |
| 2_174212910_A_G       | 0.852 | 0.022 | 0.026 |
| 18_25407513_C_G       | 0.703 | 0.018 | 0.025 |
| 6_152022664_CAAAAAA_C | 0.610 | 0.014 | 0.024 |
| 2_218292158_C_G       | 0.728 | 0.017 | 0.023 |
| 2_39699510_C_CT       | 0.474 | 0.011 | 0.022 |
| 2_121246568_T_C       | 0.893 | 0.019 | 0.022 |
| 13_43501356_A_G       | 0.827 | 0.018 | 0.022 |
| 11_129243417_T_G      | 0.860 | 0.018 | 0.021 |
| 10_22861490_A_C       | 0.935 | 0.019 | 0.020 |
| 1_110198129_CAAA_C    | 0.780 | 0.015 | 0.020 |
| 2_192381934_C_T       | 0.864 | 0.016 | 0.019 |
| 20_11379842_T_C       | 0.950 | 0.017 | 0.018 |
| 12_29140260_G_A       | 0.913 | 0.011 | 0.012 |
| 22_29551872_A_G       | 0.986 | 0.006 | 0.006 |
| 2_241388857_C_A       | 0.978 | 0.006 | 0.006 |

**Supplementary Table 6:** Mean standardized PRS<sub>313</sub> by country in controls of the pooled BCAC dataset, estimated using an Empirical Bayes approach, and when adjusted for the first 6 principal components (PCs) and array.

| Country                     | Posterior Mean (no PCs) <sup>1</sup> | Posterior Mean adjusted for 6 PCs <sup>2</sup> | 95% CI Posterior Mean adjusted for 6 PCs <sup>3</sup> | Mean PRS adjusted for 6 PCs <sup>4</sup> |
|-----------------------------|--------------------------------------|------------------------------------------------|-------------------------------------------------------|------------------------------------------|
| Australia                   | -0.003                               | 0.012                                          | -0.017, 0.041                                         | 0.010                                    |
| Belarus                     | 0.064                                | 0.048                                          | -0.022, 0.119                                         | 0.071                                    |
| Belgium                     | -0.002                               | 0.000                                          | -0.041, 0.041                                         | -0.007                                   |
| Canada                      | 0.020                                | 0.020                                          | -0.017, 0.058                                         | 0.019                                    |
| Denmark                     | -0.012                               | 0.014                                          | -0.012, 0.04                                          | 0.012                                    |
| Finland                     | 0.032                                | 0.012                                          | -0.027, 0.051                                         | 0.008                                    |
| France                      | 0.004                                | 0.001                                          | -0.045, 0.047                                         | -0.008                                   |
| Germany                     | 0.011                                | 0.005                                          | -0.016, 0.025                                         | 0.004                                    |
| Greece                      | 0.199                                | 0.038                                          | -0.023, 0.099                                         | 0.043                                    |
| Ireland                     | -0.092                               | 0.002                                          | -0.056, 0.06                                          | -0.015                                   |
| Israel                      | 0.047                                | 0.012                                          | -0.046, 0.07                                          | 0.001                                    |
| Italy                       | 0.110                                | 0.001                                          | -0.043, 0.045                                         | -0.007                                   |
| Netherlands                 | 0.022                                | 0.042                                          | 0.014, 0.07                                           | 0.043                                    |
| Norway                      | 0.066                                | 0.052                                          | -0.025, 0.129                                         | 0.094                                    |
| Poland                      | 0.015                                | 0.026                                          | -0.01, 0.062                                          | 0.025                                    |
| Republic of North Macedonia | 0.129                                | 0.049                                          | -0.037, 0.135                                         | 0.134                                    |
| Russia                      | 0.110                                | 0.060                                          | -0.023, 0.144                                         | 0.166                                    |
| Spain                       | 0.056                                | 0.001                                          | -0.038, 0.039                                         | -0.006                                   |
| Sweden                      | -0.014                               | 0.005                                          | -0.01, 0.02                                           | 0.005                                    |
| UK                          | -0.010                               | 0.019                                          | 0.004, 0.034                                          | 0.019                                    |
| USA                         | 0.029                                | 0.033                                          | 0.02, 0.046                                           | 0.033                                    |

<sup>1</sup>Country-specific estimates, means  $\beta$ , using the Empirical Bayes approach, adjusted for array

<sup>2</sup>Country-specific estimates, means  $\beta$ , using the Empirical Bayes approach, adjusted for 6 PCs and array

<sup>3</sup>95% Confidence Interval of posterior mean PRS<sub>313</sub> adjusted for 6 PCs and array

<sup>4</sup>Mean PRS<sub>313</sub> adjusted for 6 PCs and array (Supplementary Table 3A)

**Supplementary Table 7A:** Total number and percentage of controls and cases of the BCAC dataset, in each percentile of the standardized PRS<sub>313</sub> distribution (standardized by the controls). Associations between overall breast cancer risk and PRS<sub>313</sub> by percentiles.

| Percentiles | Controls | Percentage | Cases | Percentage | OR (95% CI)      | Cutoffs (using the controls) |
|-------------|----------|------------|-------|------------|------------------|------------------------------|
| <1%         | 941      | 1          | 193   | 0.2        | 0.21 (0.18-0.24) | [-2.3053558, -2.3053558]     |
| 1-5%        | 3763     | 4          | 1245  | 1.1        | 0.33 (0.31-0.36) | [-2.3053558, -1.6315827]     |
| 5-10%       | 4704     | 5          | 1969  | 1.8        | 0.42 (0.40-0.45) | [-1.6315827, -1.2814921]     |
| 10-20%      | 9407     | 10         | 4945  | 4.5        | 0.53 (0.51-0.55) | [-1.2814921, -0.8417227]     |
| 20-40%      | 18814    | 20         | 13524 | 12.3       | 0.73 (0.70-0.75) | [-0.8417227, -0.2585700]     |
| 40-60%      | 18814    | 20         | 18651 | 16.9       | REF <sup>1</sup> | [-0.2585700, 0.2491237]      |
| 60-80%      | 18814    | 20         | 25355 | 23         | 1.36 (1.32-1.40) | [0.2491237, 0.8401592]       |
| 80-90%      | 9407     | 10         | 17069 | 15.5       | 1.83 (1.77-1.89) | [0.8401592, 1.2827931]       |
| 90-95%      | 4704     | 5          | 11153 | 10.1       | 2.39 (2.30-2.49) | [1.2827931, 1.6581001]       |
| 95-99%      | 3763     | 4          | 11438 | 10.4       | 3.06 (2.93-3.19) | [1.6581001, 2.3365986]       |
| ≥99%        | 941      | 1          | 4718  | 4.3        | 5.06 (4.70-5.44) | [2.3365986, 5.0236339]       |

<sup>1</sup> The 40-60% was used as the reference percentile

**Supplementary Table 7B:** Total number and percentage of controls and cases by country of the BCAC dataset, included in the 90th percentile of the distribution when using pooled dataset (Individuals with standardized PRS<sub>313</sub> ≥ 1.283)

| Country                     | Controls | Percentage    | Cases | Percentage | Percentage of the difference | Country                     | Controls | Cases |
|-----------------------------|----------|---------------|-------|------------|------------------------------|-----------------------------|----------|-------|
| Australia                   | 439      | 10.842        | 1122  | 24.067     | -0.842                       | Australia                   | 4049     | 4662  |
| Belarus                     | 52       | <b>15.205</b> | 137   | 18.414     | <b>-5.205</b>                | Belarus                     | 342      | 744   |
| Belgium                     | 175      | 9.600         | 770   | 22.660     | 0.400                        | Belgium                     | 1823     | 3398  |
| Canada                      | 249      | 10.935        | 877   | 26.495     | -0.935                       | Canada                      | 2277     | 3310  |
| Denmark                     | 487      | 9.292         | 1009  | 23.602     | 0.708                        | Denmark                     | 5241     | 4275  |
| Finland                     | 230      | 11.042        | 732   | 25.793     | -1.042                       | Finland                     | 2083     | 2838  |
| France                      | 117      | <b>8.528</b>  | 315   | 24.457     | <b>1.472</b>                 | France                      | 1372     | 1288  |
| Germany                     | 819      | 9.564         | 4549  | 25.440     | 0.436                        | Germany                     | 8563     | 17881 |
| Greece                      | 83       | <b>13.674</b> | 345   | 27.556     | <b>-3.674</b>                | Greece                      | 607      | 1252  |
| Ireland                     | 60       | <b>8.345</b>  | 157   | 19.798     | <b>1.655</b>                 | Ireland                     | 719      | 793   |
| Israel                      | 97       | <b>13.398</b> | 348   | 26.028     | <b>-3.398</b>                | Israel                      | 724      | 1337  |
| Italy                       | 183      | 11.776        | 457   | 30.858     | <b>-1.776</b>                | Italy                       | 1554     | 1481  |
| Netherlands                 | 475      | 10.778        | 1394  | 27.791     | -0.778                       | Netherlands                 | 4407     | 5016  |
| Norway                      | 22       | 10.138        | 589   | 24.686     | -0.138                       | Norway                      | 217      | 2386  |
| Poland                      | 266      | 10.415        | 622   | 25.388     | -0.415                       | Poland                      | 2554     | 2450  |
| Republic of North Macedonia | 15       | <b>16.304</b> | 31    | 39.744     | <b>-6.304</b>                | Republic of North Macedonia | 92       | 78    |
| Russia                      | 16       | <b>13.333</b> | 56    | 26.540     | <b>-3.333</b>                | Russia                      | 120      | 211   |
| Spain                       | 213      | 10.153        | 839   | 26.857     | -0.153                       | Spain                       | 2098     | 3124  |
| Sweden                      | 1603     | 9.610         | 2997  | 25.065     | 0.390                        | Sweden                      | 16680    | 11957 |
| UK                          | 1580     | 9.375         | 5206  | 24.406     | 0.625                        | UK                          | 16854    | 21331 |
| USA                         | 2227     | 10.265        | 4757  | 23.264     | -0.265                       | USA                         | 21696    | 20448 |

**Supplementary Table 7C:** Total number and percentage of controls and cases by country of the BCAC dataset, included in the 95th percentile of the distribution when using pooled dataset (Individuals with standardized PRS<sub>313</sub> ≥ 1.658)

| Country   | Controls | Percentage | Cases | Percentage | Percentage of the difference | Country   | Controls | Cases |
|-----------|----------|------------|-------|------------|------------------------------|-----------|----------|-------|
| Australia | 198      | 4.890      | 687   | 14.736     | 0.110                        | Australia | 4049     | 4662  |
| Belarus   | 31       | 9.064      | 83    | 11.156     | -4.064                       | Belarus   | 342      | 744   |
| Belgium   | 96       | 5.266      | 471   | 13.861     | -0.266                       | Belgium   | 1823     | 3398  |
| Canada    | 125      | 5.490      | 540   | 16.314     | -0.490                       | Canada    | 2277     | 3310  |
| Denmark   | 243      | 4.637      | 580   | 13.567     | 0.363                        | Denmark   | 5241     | 4275  |

|                             |      |       |      |        |        |                             |       |       |
|-----------------------------|------|-------|------|--------|--------|-----------------------------|-------|-------|
| Finland                     | 114  | 5.473 | 421  | 14.834 | -0.473 | Finland                     | 2083  | 2838  |
| France                      | 53   | 3.863 | 188  | 14.596 | 1.137  | France                      | 1372  | 1288  |
| Germany                     | 416  | 4.858 | 2686 | 15.022 | 0.142  | Germany                     | 8563  | 17881 |
| Greece                      | 38   | 6.260 | 219  | 17.492 | -1.260 | Greece                      | 607   | 1252  |
| Ireland                     | 26   | 3.616 | 86   | 10.845 | 1.384  | Ireland                     | 719   | 793   |
| Israel                      | 42   | 5.801 | 199  | 14.884 | -0.801 | Israel                      | 724   | 1337  |
| Italy                       | 85   | 5.470 | 275  | 18.569 | -0.470 | Italy                       | 1554  | 1481  |
| Netherlands                 | 244  | 5.537 | 866  | 17.265 | -0.537 | Netherlands                 | 4407  | 5016  |
| Norway                      | 10   | 4.608 | 340  | 14.250 | 0.392  | Norway                      | 217   | 2386  |
| Poland                      | 152  | 5.951 | 375  | 15.306 | -0.951 | Poland                      | 2554  | 2450  |
| Republic of North Macedonia | 8    | 8.696 | 19   | 24.359 | -3.696 | Republic of North Macedonia | 92    | 78    |
| Russia                      | 7    | 5.833 | 34   | 16.114 | -0.833 | Russia                      | 120   | 211   |
| Spain                       | 116  | 5.529 | 515  | 16.485 | -0.529 | Spain                       | 2098  | 3124  |
| Sweden                      | 802  | 4.808 | 1783 | 14.912 | 0.192  | Sweden                      | 16680 | 11957 |
| UK                          | 787  | 4.670 | 3039 | 14.247 | 0.330  | UK                          | 16854 | 21331 |
| USA                         | 1111 | 5.121 | 2750 | 13.449 | -0.121 | USA                         | 21696 | 20448 |

**Supplementary Table 7D:** Total number and percentage of controls and cases by country of the BCAC dataset, included in the 99th percentile of the distribution when using pooled dataset (Individuals with standardized PRS<sub>313</sub> ≥ 2.337)

| Country                     | Controls | Percentage | Cases | Percentage | Percentage of the difference | Country                     | Controls | Cases |
|-----------------------------|----------|------------|-------|------------|------------------------------|-----------------------------|----------|-------|
| Australia                   | 30       | 0.644      | 201   | 4.311      | 0.356                        | Australia                   | 4049     | 4662  |
| Belarus                     | 6        | 0.806      | 20    | 2.688      | 0.194                        | Belarus                     | 342      | 744   |
| Belgium                     | 19       | 0.559      | 148   | 4.356      | 0.441                        | Belgium                     | 1823     | 3398  |
| Canada                      | 25       | 0.755      | 171   | 5.166      | 0.245                        | Canada                      | 2277     | 3310  |
| Denmark                     | 39       | 0.912      | 153   | 3.579      | 0.088                        | Denmark                     | 5241     | 4275  |
| Finland                     | 17       | 0.599      | 122   | 4.299      | 0.401                        | Finland                     | 2083     | 2838  |
| France                      | 18       | 1.398      | 50    | 3.882      | -0.398                       | France                      | 1372     | 1288  |
| Germany                     | 92       | 0.515      | 783   | 4.379      | 0.485                        | Germany                     | 8563     | 17881 |
| Greece                      | 10       | 0.799      | 71    | 5.671      | 0.201                        | Greece                      | 607      | 1252  |
| Ireland                     | 5        | 0.631      | 27    | 3.405      | 0.369                        | Ireland                     | 719      | 793   |
| Israel                      | 11       | 0.823      | 56    | 4.188      | 0.177                        | Israel                      | 724      | 1337  |
| Italy                       | 13       | 0.878      | 96    | 6.482      | 0.122                        | Italy                       | 1554     | 1481  |
| Netherlands                 | 58       | 1.156      | 270   | 5.383      | -0.156                       | Netherlands                 | 4407     | 5016  |
| Norway                      | 1        | 0.042      | 91    | 3.814      | 0.958                        | Norway                      | 217      | 2386  |
| Poland                      | 29       | 1.184      | 102   | 4.163      | -0.184                       | Poland                      | 2554     | 2450  |
| Republic of North Macedonia | 0        | 0.000      | 3     | 3.846      | 1.000                        | Republic of North Macedonia | 92       | 78    |
| Russia                      | 2        | 0.948      | 6     | 2.844      | 0.052                        | Russia                      | 120      | 211   |
| Spain                       | 19       | 0.608      | 161   | 5.154      | 0.392                        | Spain                       | 2098     | 3124  |
| Sweden                      | 157      | 1.313      | 529   | 4.424      | -0.313                       | Sweden                      | 16680    | 11957 |
| UK                          | 151      | 0.708      | 848   | 3.975      | 0.292                        | UK                          | 16854    | 21331 |
| USA                         | 238      | 1.164      | 809   | 3.956      | -0.164                       | USA                         | 21696    | 20448 |



**Supplementary Table 8:** Total number and percentage of controls and cases in each percentile of the standardized PRS<sub>313</sub> distribution (standardized by the controls) in Greece, Italy and Ireland of the BCAC dataset. Associations between overall breast cancer risk and PRS<sub>313</sub> by percentiles.

| Greece      |          |            |       |            |                  |                            |
|-------------|----------|------------|-------|------------|------------------|----------------------------|
| Percentiles | Controls | Percentage | Cases | Percentage | OR (95% CI)      | Cut-offs values            |
| <1%         | 7        | 1.2        | 8     | 0.6        | 0.63 (0.22-1.83) | [min, -1.88176607)         |
| 1-5%        | 24       | 4          | 29    | 2.3        | 0.66 (0.37-1.20) | [-1.88176607, -1.24389310) |
| 5-10%       | 30       | 4.9        | 20    | 1.6        | 0.37 (0.20-0.67) | [-1.24389310, -1.01592260) |
| 10-20%      | 61       | 10         | 61    | 4.9        | 0.55 (0.36-0.84) | [-1.01592260, -0.61338082) |
| 20-40%      | 121      | 19.9       | 172   | 13.7       | 0.78 (0.57-1.08) | [-0.61338082, -0.03013492) |
| 40-60%      | 121      | 19.9       | 220   | 17.6       | REF <sup>1</sup> | [-0.03013492, 0.47473869)  |
| 60-80%      | 121      | 19.9       | 301   | 24         | 1.37 (1.01-1.86) | [0.47473869, 1.07401938)   |
| 80-90%      | 61       | 10         | 152   | 12.1       | 1.37 (0.95-1.99) | [1.07401938, 1.44121042)   |
| 90-95%      | 30       | 4.9        | 97    | 7.7        | 1.78 (1.13-2.87) | [1.44121042, 1.74175509)   |
| 95-99%      | 24       | 4          | 143   | 11.4       | 3.28 (2.05-5.43) | [1.74175509, 2.54277555)   |
| ≥99%        | 7        | 1.2        | 49    | 3.9        | 3.85 (1.80-9.55) | [2.54277555, max]          |

| Ireland     |          |            |       |            |                   |                            |
|-------------|----------|------------|-------|------------|-------------------|----------------------------|
| Percentiles | Controls | Percentage | Cases | Percentage | OR (95% CI)       | Cut-offs values            |
| <1%         | 8        | 1.1        | 0     | 0          | na                | [min, -2.78568527)         |
| 1-5%        | 28       | 3.9        | 10    | 1.3        | 0.43 (0.19-0.90)  | [-2.78568527, -1.85698670) |
| 5-10%       | 36       | 5          | 8     | 1          | 0.27 (0.11-0.57)  | [-1.85698670, -1.41687903) |
| 10-20%      | 72       | 10         | 37    | 4.7        | 0.62 (0.39-0.99)  | [-1.41687903, -0.88761545) |
| 20-40%      | 144      | 20         | 95    | 12         | 0.80 (0.56-1.14)  | [-0.88761545, -0.35313128) |
| 40-60%      | 143      | 19.9       | 118   | 14.9       | REF <sup>1</sup>  | [-0.35313128, 0.09498293)  |
| 60-80%      | 144      | 20         | 201   | 25.3       | 1.69 (1.22-2.34)  | [0.09498293, 0.67706851)   |
| 80-90%      | 72       | 10         | 146   | 18.4       | 2.46 (1.70-3.58)  | [0.67706851, 1.17758635)   |
| 90-95%      | 36       | 5          | 63    | 7.9        | 2.12 (1.32-3.44)  | [1.17758635, 1.50563968)   |
| 95-99%      | 28       | 3.9        | 79    | 10         | 3.42 (2.11-5.68)  | [1.50563968, 2.15571744)   |
| ≥99%        | 8        | 1.1        | 36    | 4.5        | 5.45 (2.56-13.04) | [2.15571744, 2.77218282]   |

| Italy       |          |            |       |            |                   |                          |
|-------------|----------|------------|-------|------------|-------------------|--------------------------|
| Percentiles | Controls | Percentage | Cases | Percentage | OR (95% CI)       | Cut-offs values          |
| <1%         | 16       | 1          | 3     | 0.2        | 0.24 (0.06-0.74)  | [min., -2.1102335)       |
| 1-5%        | 62       | 4          | 10    | 0.7        | 0.21 (0.10-0.40)  | [-2.1102335, -1.5322247) |
| 5-10%       | 78       | 5          | 33    | 2.2        | 0.55 (0.35-0.85)  | [-1.5322247, -1.1617753) |
| 10-20%      | 155      | 10         | 63    | 4.3        | 0.53 (0.37-0.74)  | [-1.1617753, -0.7342892) |
| 20-40%      | 311      | 20         | 172   | 11.6       | 0.72 (0.56-0.92)  | [-0.7342892, -0.1293942) |
| 40-60%      | 310      | 19.9       | 239   | 16.1       | REF <sup>1</sup>  | [-0.1293942, 0.3798952)  |
| 60-80%      | 311      | 20         | 320   | 21.6       | 1.33 (1.06-1.68)  | [0.3798952, 0.9339705)   |
| 80-90%      | 155      | 10         | 228   | 15.4       | 1.91 (1.47-2.49)  | [0.9339705, 1.3848687)   |
| 90-95%      | 78       | 5          | 154   | 10.4       | 2.56 (1.86-3.54)  | [1.3848687, 1.7086773)   |
| 95-99%      | 62       | 4          | 156   | 10.5       | 3.26 (2.34-4.61)  | [1.7086773, 2.2943850)   |
| ≥99%        | 16       | 1          | 103   | 7          | 8.35 (4.94-15.03) | [2.2943850, 5.0236339]   |

<sup>1</sup> The 40-60% was used as the reference percentile

**Supplementary Table 9:** Associations between PRS<sub>313</sub> and breast cancer risk by country, when using the pooled BCAC dataset.

| Country                     | OR (95% CI) <sup>1</sup> | OR (95% CI) <sup>2</sup> adjusted by 10 PCs |
|-----------------------------|--------------------------|---------------------------------------------|
| All                         | 1.80 (1.78-1.82)         | 1.80 (1.78-1.82)                            |
| Australia                   | 1.83 (1.74-1.92)         | 1.83 (1.75-1.93)                            |
| Belarus                     | 1.37 (1.20-1.58)         | 1.39 (1.21-1.61)                            |
| Belgium <sup>3</sup>        | 1.80 (1.68-1.92)         | 1.85 (1.70-2.02) / 1.79 (1.68-1.92)         |
| Canada                      | 1.77 (1.67-1.88)         | 1.77 (1.66-1.88)                            |
| Denmark                     | 1.80 (1.72-1.88)         | 1.80 (1.72-1.88)                            |
| Finland                     | 1.86 (1.75-1.98)         | 1.86 (1.75-1.99)                            |
| France                      | 1.83 (1.68-1.99)         | 1.85 (1.70-2.01)                            |
| Germany                     | 1.83 (1.78-1.88)         | 1.83 (1.78-1.88)                            |
| Greece                      | 1.66 (1.50-1.85)         | 1.65 (1.49-1.84)                            |
| Ireland                     | 1.89 (1.69-2.12)         | 1.93 (1.72-2.16)                            |
| Israel                      | 1.73 (1.57-1.90)         | 1.73 (1.57-1.90)                            |
| Italy                       | 1.91 (1.76-2.06)         | 1.91 (1.76-2.07)                            |
| Netherlands                 | 1.95 (1.86-2.04)         | 1.95 (1.86-2.04)                            |
| Norway <sup>4</sup>         | 1.75 (1.51-2.03)         | 1.81 (1.54-2.13)                            |
| Poland                      | 1.79 (1.69-1.90)         | 1.79 (1.69-1.91)                            |
| Republic of North Macedonia | 1.75 (1.29-2.44)         | 1.87 (1.34-2.67)                            |
| Russia                      | 1.59 (1.27-2.01)         | 1.59 (1.26-2.03)                            |
| Spain                       | 1.88 (1.77-2.00)         | 1.88 (1.77-2.00)                            |
| Sweden                      | 1.86 (1.81-1.91)         | 1.86 (1.81-1.91)                            |
| UK                          | 1.85 (1.81-1.89)         | 1.85 (1.81-1.89)                            |
| USA                         | 1.67 (1.63-1.70)         | 1.66 (1.63-1.70)                            |

<sup>1</sup> Adjusted for array and study when appropriate.

<sup>2</sup> Adjusted for the first 10 PCs of iCOGS and 10 PCs of OncoArray, and array and study when appropriate.

<sup>3</sup> For Belgium, in the second column, the first value was derived when the model was also adjusted for the LMBC PC, and the second when was not.

<sup>4</sup> Not adjusted for array, since OncoArray did not include controls

**Supplementary Table 10:** Associations between PRS<sub>313</sub> and breast cancer risk by country, when excluding samples included in the training set of BCAC (as used from Mavaddat et al., 2019 AJHG (1)).

| Country      | Controls | Cases | OR (95% CI) <sup>1</sup> | OR (95% CI) <sup>2</sup> adjusted for 10 PCs | Mean (SE) PRS in Controls |
|--------------|----------|-------|--------------------------|----------------------------------------------|---------------------------|
| All          | 28098    | 26618 | 1.64 (1.61-1.67)         | 1.64 (1.61-1.67)                             | 0.047                     |
| Australia*   | 383      | 411   | 1.46 (1.25-1.71)         | 1.51 (1.29-1.77)                             | 0.081(0.05)               |
| Belgium      | 87       | 156   | 1.56 (1.19-2.07)         | 1.72 (1.28-2.34)                             | 0.112(0.11)               |
| Canada       | 432      | 168   | 1.61 (1.34-1.95)         | 1.64 (1.36-1.99)                             | 0.2(0.05)                 |
| Denmark      | 142      | 230   | 1.73 (1.37-2.21)         | 1.80 (1.42-2.32)                             | -0.002(0.08)              |
| France       | 370      | 378   | 1.59 (1.38-1.84)         | 1.60 (1.39-1.86)                             | 0.097(0.05)               |
| Germany      | 928      | 4118  | 1.59 (1.44-1.75)         | 1.58 (1.48-1.68)                             | 0.041(0.03)               |
| Greece       | 246      | 306   | 1.61 (1.35-1.94)         | 1.63 (1.36-1.97)                             | 0.3(0.06)                 |
| Israel       | 145      | 263   | 1.63 (1.33-2.01)         | 1.64 (1.33-2.05)                             | 0.115(0.08)               |
| Italy*       | 788      | 744   | 1.78 (1.60-1.98)         | 1.78 (1.60-1.98)                             | 0.07(0.04)                |
| Netherlands* | 808      | 782   | 1.54 (1.39-1.71)         | 1.54 (1.39-1.71)                             | 0.047(0.04)               |
| Poland       | 331      | 217   | 1.57 (1.33-1.87)         | 1.57 (1.32-1.87)                             | -0.001(0.06)              |
| Spain        | 647      | 812   | 1.61 (1.44-1.79)         | 1.63 (1.47-1.83)                             | 0.061(0.04)               |
| Sweden       | 5052     | 1819  | 1.68 (1.59-1.79)         | 1.68 (1.58-1.78)                             | 0.0003(0.01)              |
| UK           | 4503     | 5082  | 1.60 (1.51-1.69)         | 1.61 (1.52-1.70)                             | 0.069(0.02)               |
| USA          | 13236    | 11132 | 1.64 (1.59-1.68)         | 1.64 (1.59-1.69)                             | 0.047(0.01)               |

PRS<sub>313</sub> was standardized based on the mean and SD of all controls in the dataset

<sup>1</sup> Adjusted for array and study when appropriate.

<sup>2</sup> Adjusted for the first 10 PCs of iCOGS and 10 PCs of OncoArray, and array and study when appropriate.

\*Only few individuals genotyped using iCOGS, so not adjusted for array (and icogs' PCs). For Italy, also not adjusted for study.

References:

1. Mavaddat N, Michailidou K, Dennis J, Lush M, Fachal L, Lee A, et al. Polygenic Risk Scores for Prediction of Breast Cancer and Breast Cancer Subtypes. *American journal of human genetics*. 2019;104(1):21-34.
